# Supplementary material for: Failed immune responses across multiple pathologies share pan-tumor and circulating lymphocytic targets
Source: JCI journal article supplement (doi:10.1172/jci125301), 2019-03-26
Supplement: sd1 [file 1]

## **Supplemental Figures and Tables for:**

### **Failed immune responses across multiple pathologies share pan-tumor and circulating lymphocytic targets**

#### **Includes Supplemental Figures:**

Figure S1. Full schematic pan-cancer discovery pipeline.

Figure S2. Sample quality control experiments for comprehensive microarrays.

Figure S3. Pan-cancer DEG refinery.

Figure S4. Validation and analysis of pan-cancer and polarizing DEGs.

Figure S5. Independent DEG groups from 12-gene set cannot stratify patients.

Figure S6. PPI of top 200 pan-cancer DEGs provide insights on core target pathways.

Figure S7. Complete ccRCC ptPBL PPI visual.

Figure S8. MMP9 extended pathway analyses.

Figure S9. MMP9 full pathways DEGs from Figure 7c

#### **Includes Supplemental Tables:**

Table S1. Clinicopathological patient parameters.

Table S2. Non-redundant pan-cancer DEGs expressed in T/B cells.

Table S3. Top 100 Pan-cancer DEGs with cell assignment FC and Literature.

Table S4. Selected Pan-cancer and T cell polarizing DEGs for validation.

Table S5. Comparison of validation assays to HIV-1 elite controllers.

Table S6. Immunotherapy Resistance genes common to Pan-cancer DEGs.

Table S7. Pan-cancer and T cell DEG validation summary.

Table S8. Spliceforms results for Pan-cancer DEGs.

Table S9. ptPBL DEGs correlating with MMP9 pathways.

Figure S1

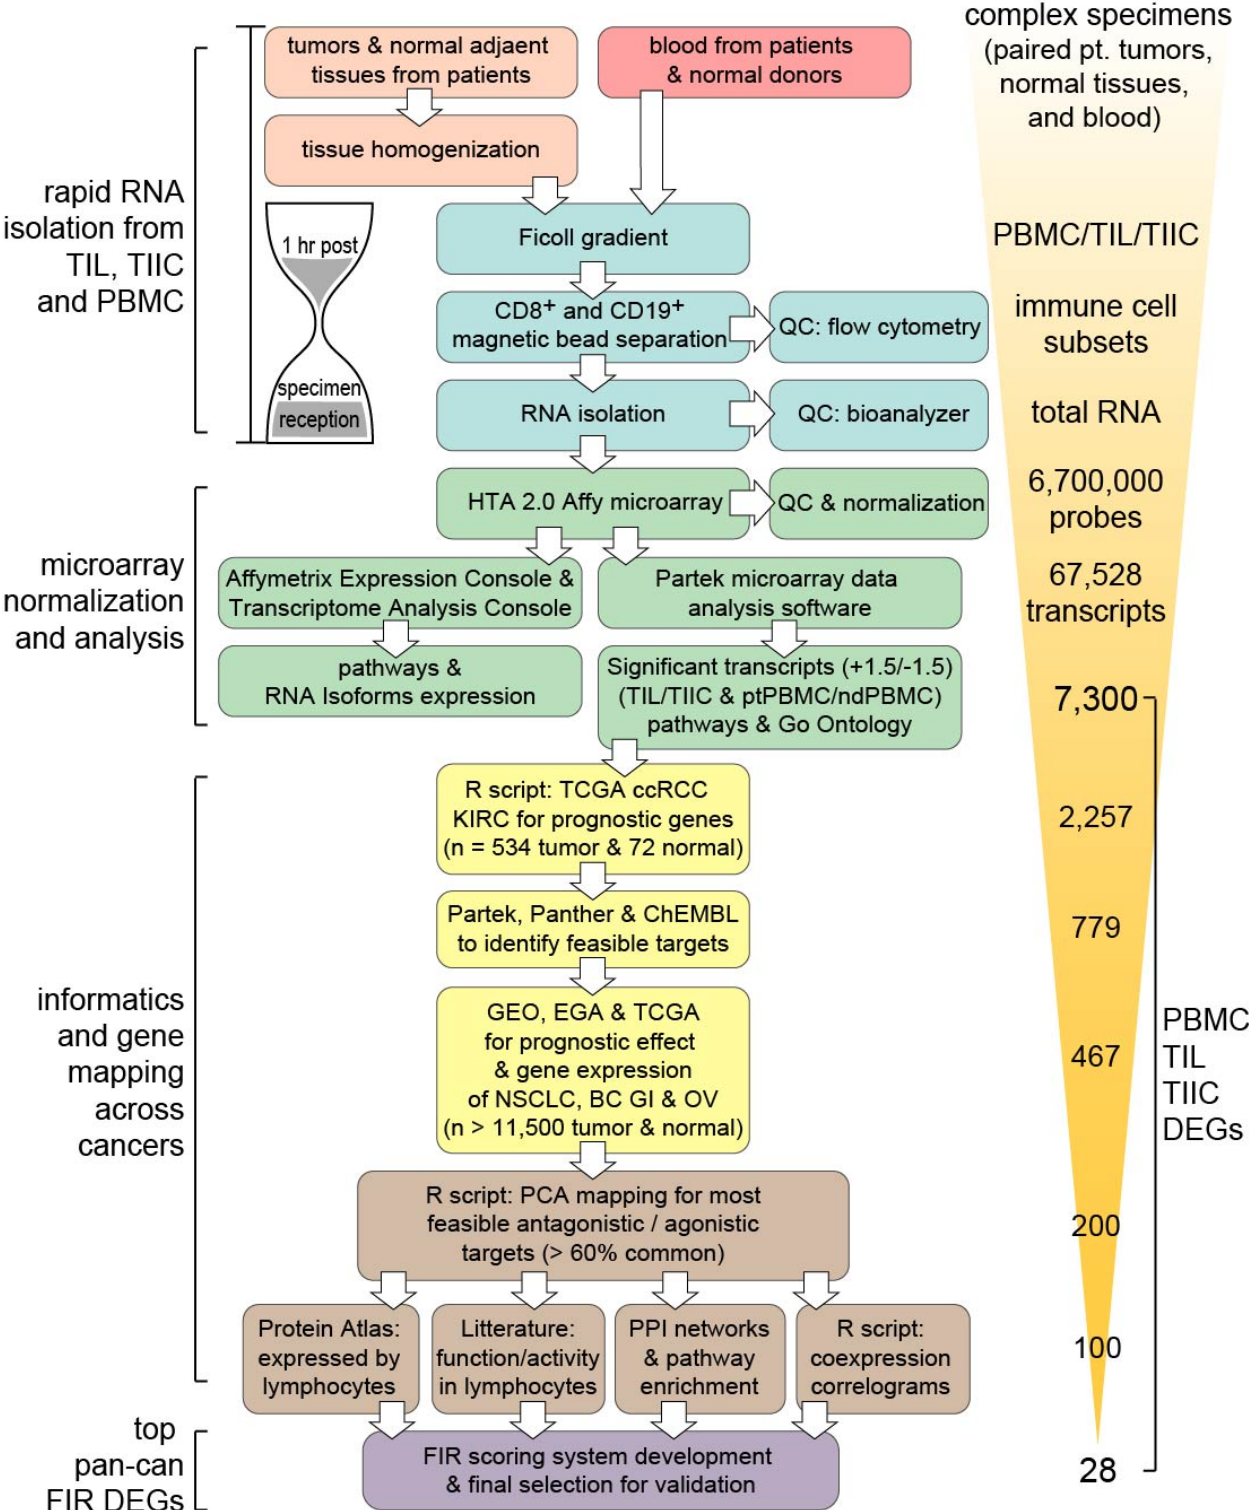

**Supplemental Figure S1. Full schematic pan-cancer discovery pipeline.** Pan-cancer discovery pipeline permitting the refining of >7,300 DEGs identified from training ccRCC cohort, down to ~30 for validation on new ccRCC cohort, as first identified by microarrays performed on paired patient CD8<sup>+</sup> and CD19<sup>+</sup> TIL and TIL-B, TIIC, and ptPBL, and matched cdPBL. Tumors, normal adjacent tissues and blood are simultaneously received, and used for rapid (~1hr) isolation of immune cell subsets via tissue homogenizing followed by Ficoll gradient and magnetic bead separation. Quality tested RNA is amplified and applied to comprehensive microarray profiling. Gene expression profiles are normalized and DEGs are identified by comparing expression in TIL relative to TIIC, and ptPBL relative to cdPBL (n = 5; fold 1.5; P < 0.05). Algorithms designed to probe The Cancer Genome Atlas (TCGA) ccRCC KIRC RNA-Seq and clinical databases (n = 534 tumors; n = 72 normal tissues) were used to identify ccRCC DEGs that had significant effects on patient prognosis. DEGs were refined for most feasible targets by selecting Gene Ontology defined plasma membrane associated proteins (Partek and PANTHER), and proteins having pre-existing targeting compounds for potential drug repurposing (ChEMBL). Additional microarray datasets for lung, breast, gastric and ovarian cancers were probed (n = >11,500 tumors and normal tissues) to refine pan-cancer DEGs that had significant effects on patient prognosis. Principal component analysis (PCA) was used to view most feasible pan-cancer targets (R and R studio). Pan-cancer DEGs were further refined using a four pronged scoring system, taking into account: expression of DEGs by lymphoid and myeloid cells and having modified expression in cancers relative to normal tissues (n = 17 cancers; The Human Protein Atlas), literary evidence that DEGs have been experimentally determined to be expressed in target cells, with existing functional classification in those cell types, and DEG protein-protein interaction (PPI) and coexpression analyses. DEG, differentially expressed genes; TIL, tumor infiltrating lymphocytes; TIIC, normal adjacent tissue infiltrating immune cells; pt, patient; nd, normal donor; PBL, peripheral blood lymphocytes; QC, quality control; HTA, GeneChip Human Transcriptome Array 2.0; TCGA, the Cancer Genome Atlas; GEO, Gene Expression Omnibus; EGA, European Genome-phenome Archive; ccRCC, clear cell renal cell cancer; NSCLC, non-small cell lung cancer; BC, breast cancer; GI gastric cancer; OV, ovarian cancer; PPIs, protein-protein interactions; FIR, failed immune response.

Figure S2

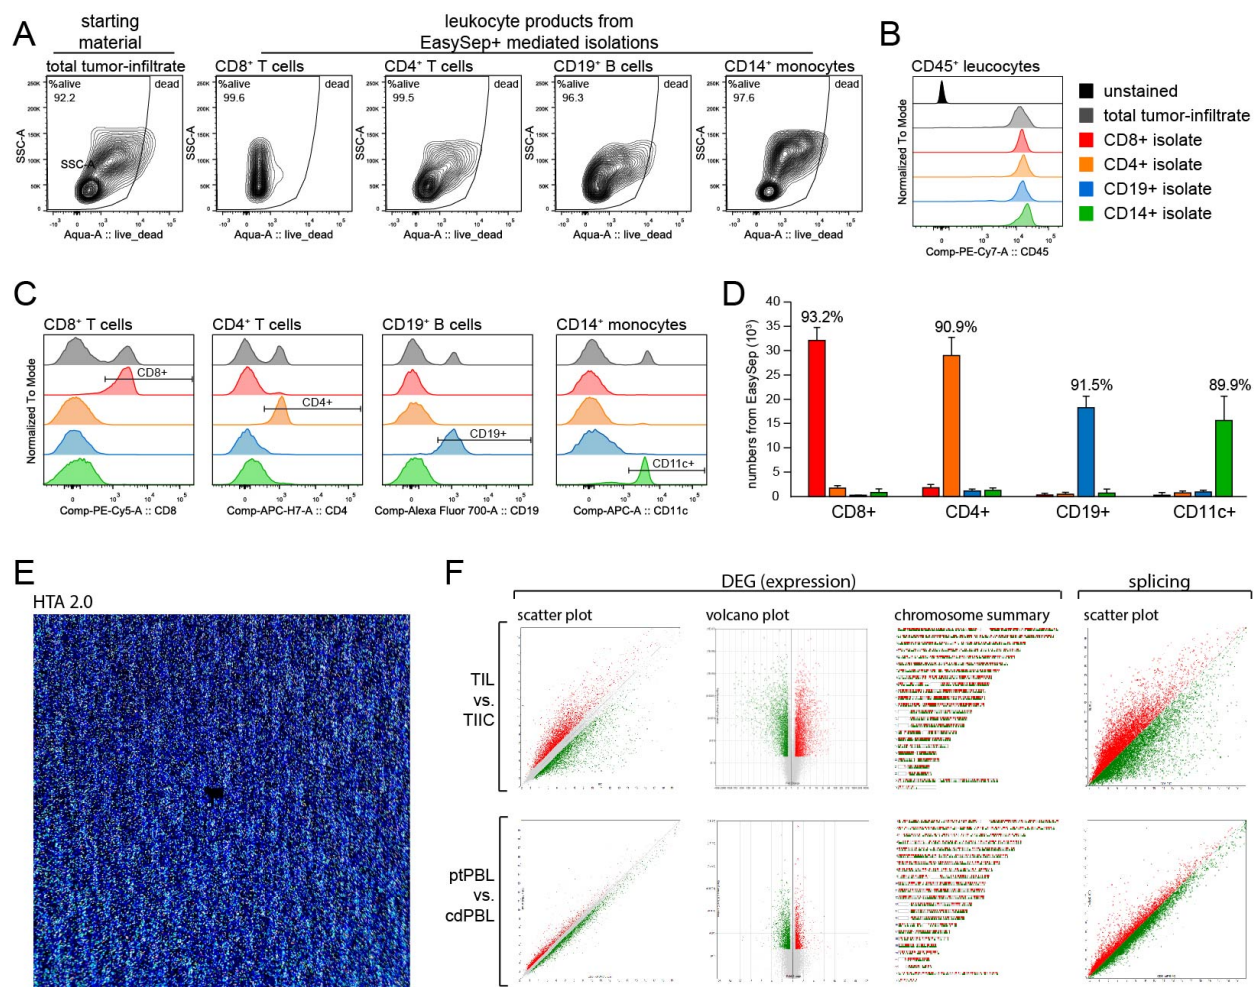

**Supplemental Figure S2. Sample quality control (QC) experiments performed for comprehensive microarrays.** QC experiments demonstrate efficient isolation of specific immune subsets from tumors, perfect chip-hybridization and example of paired total CD8<sup>+</sup> DEGs resulting from microarrays. Following their magnetic bead-mediated isolation, immune cell subsets were labelled for multi-parametric (M-P) flow cytometry analysis verifying their viabilities, via gating on Aqua LIVE/DEAD assay (Molecular Probes) and quality of their separation from other immune cell subsets isolated by Ficoll gradients. **(A)** Validation of viability of total leukocytes isolated from tumors (left), and CD8<sup>+</sup>, CD4<sup>+</sup>, CD19<sup>+</sup>, and CD14<sup>+</sup> tumor infiltrating immune cell subsets isolated using positive selection kits from STEMCELL, as shown by contour plots due to low numbers of isolates. **(B)** Validation that all immune cells isolated from tumors were CD45<sup>+</sup> using  $\alpha$ -CD45-PE-Cy7 antibody (BD biosciences), using FlowJo v.10 overlay graphs normalized to mode. **(C)** Visual demonstration that positive selection kits were able to rapidly and efficiently separate numerous desired immune cell subsets from tumors, with very little contamination from other immune cell subsets, using clones that are not represented in STEMCELL isolation kits (i.e.,  $\alpha$ -CD8-PE-Cy5,  $\alpha$ -CD4-APC-H7,  $\alpha$ -CD19-AF700,  $\alpha$ -CD11c-APC; BD biosciences), using FlowJo v.10 overlay graphs normalized to mode (color scheme legend as in **(B)**). Representative percentages of isolates relative to other species examined are shown in **(D)**. **(E)** Screen shot example supporting visualization of HTA 2.0 chip hybridization of total amplified CD8<sup>+</sup> RNA isolated from TIL (described in methods), where black box in center serves as negative control. **(F)** Examples of CD8<sup>+</sup> TIL vs TIIC and ptPBL vs cdPBL DEG expression via scatter and volcano plots, and non-specific chromosome summary segregation patterns of DEG expression, along with splicing/isoform scatter plots of DEGs generated by TAC software (Affymetrix). These demonstrating that TIL have much larger difference in reference to TIIC than ptPBL have in reference to cdPBL. DEG, differentially expressed genes; TIL, tumor infiltrating lymphocytes; TIIC, normal adjacent tissue infiltrating immune cells; pt, patient; nd, normal donor; PBL, peripheral blood lymphocytes.

Figure S3

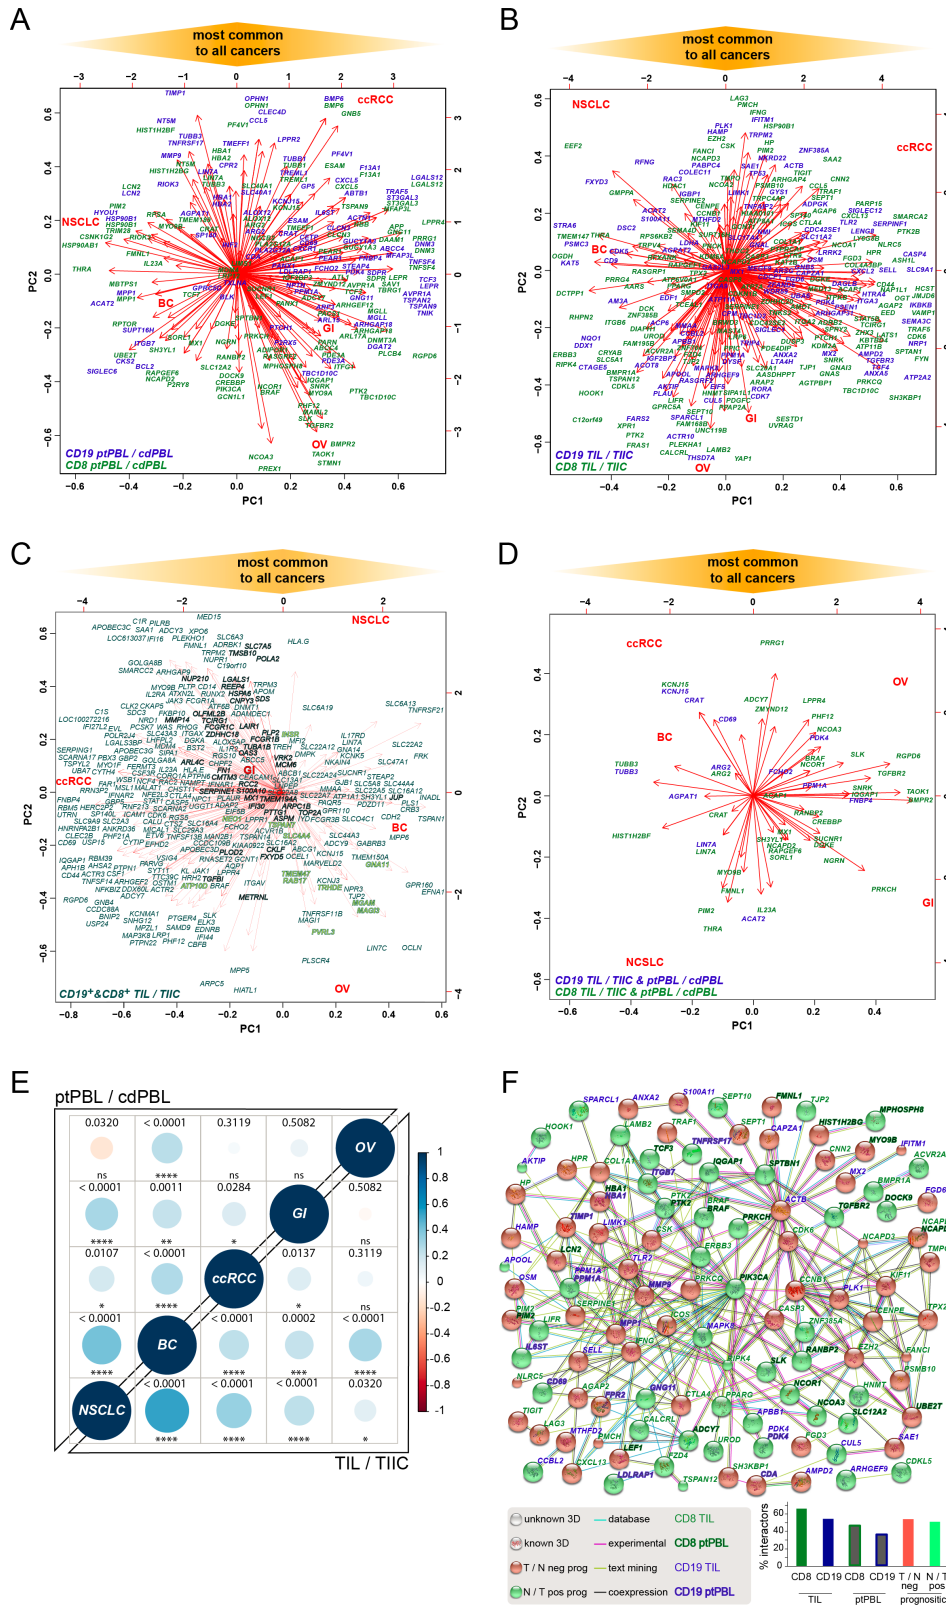

**Supplemental Figure S3: Pan-cancer DEG refinery.** (A-C) Principal component analyses (PCA) of pan-cancer DEGs identified from prognostic and expression scoring across five cancers, common CD8<sup>+</sup> (green) or CD19<sup>+</sup> (blue) ptPBL (A), TIL (B) ccRCC identified DEGs at PCA intersects. (C) DEGs common to CD8<sup>+</sup> TILs and CD19<sup>+</sup> TIL-Bs are shown, where dark highlighted gene names represent best antagonistic targets, and green highlighted gene names represent best agonistic targets. (D) PCA biplot of DEGs that are commonly identified from ccRCC ptPBL and TIL, where those most common across five cancers are found at PCA intersects. (E) Patient PBL and TIL correlograms demonstrating similarities of prognostic effects and gene expression modulation among 483 pan-cancer prognostic biomarkers queried for refinement; demonstrating that DEGs identified from ccRCC ptPBL and TIL have similar results across other cancers: breast cancer (BC), non-small cell lung cancer (NSCLC), gastric cancers (GI), and ovarian cancers (OV) ( $n > 11,500$ ) (Spearman method, coexpression coefficient ladder on right). (F) Protein-protein interaction (PPI) networks between the top 200 DEGs discovered. A high PPI enrichment value ( $P = 1.85e-10$ ) indicates interactions among these DEGs is very significant relative to proteins drawn from the genome at random; an indicator of biologically connection as groups in defined pathways. Pan-cancer score defined agonistic and antagonistic DEGs are colored red and green, respectively to demonstrate groupings of these two pan-cancer subclasses in unsupervised PPI matrix (String software, v10.5). Bottom graph demonstrates that TIL DEGs are most involved observed in PPI, as are those discovered from CD8<sup>+</sup> TIL and ptPBL. TIL, tumor infiltrating lymphocytes; TIIC, normal adjacent tissue infiltrating immune cells; pt, patient; nd, normal donor; PBL, peripheral blood mononuclear cells.

Figure S4

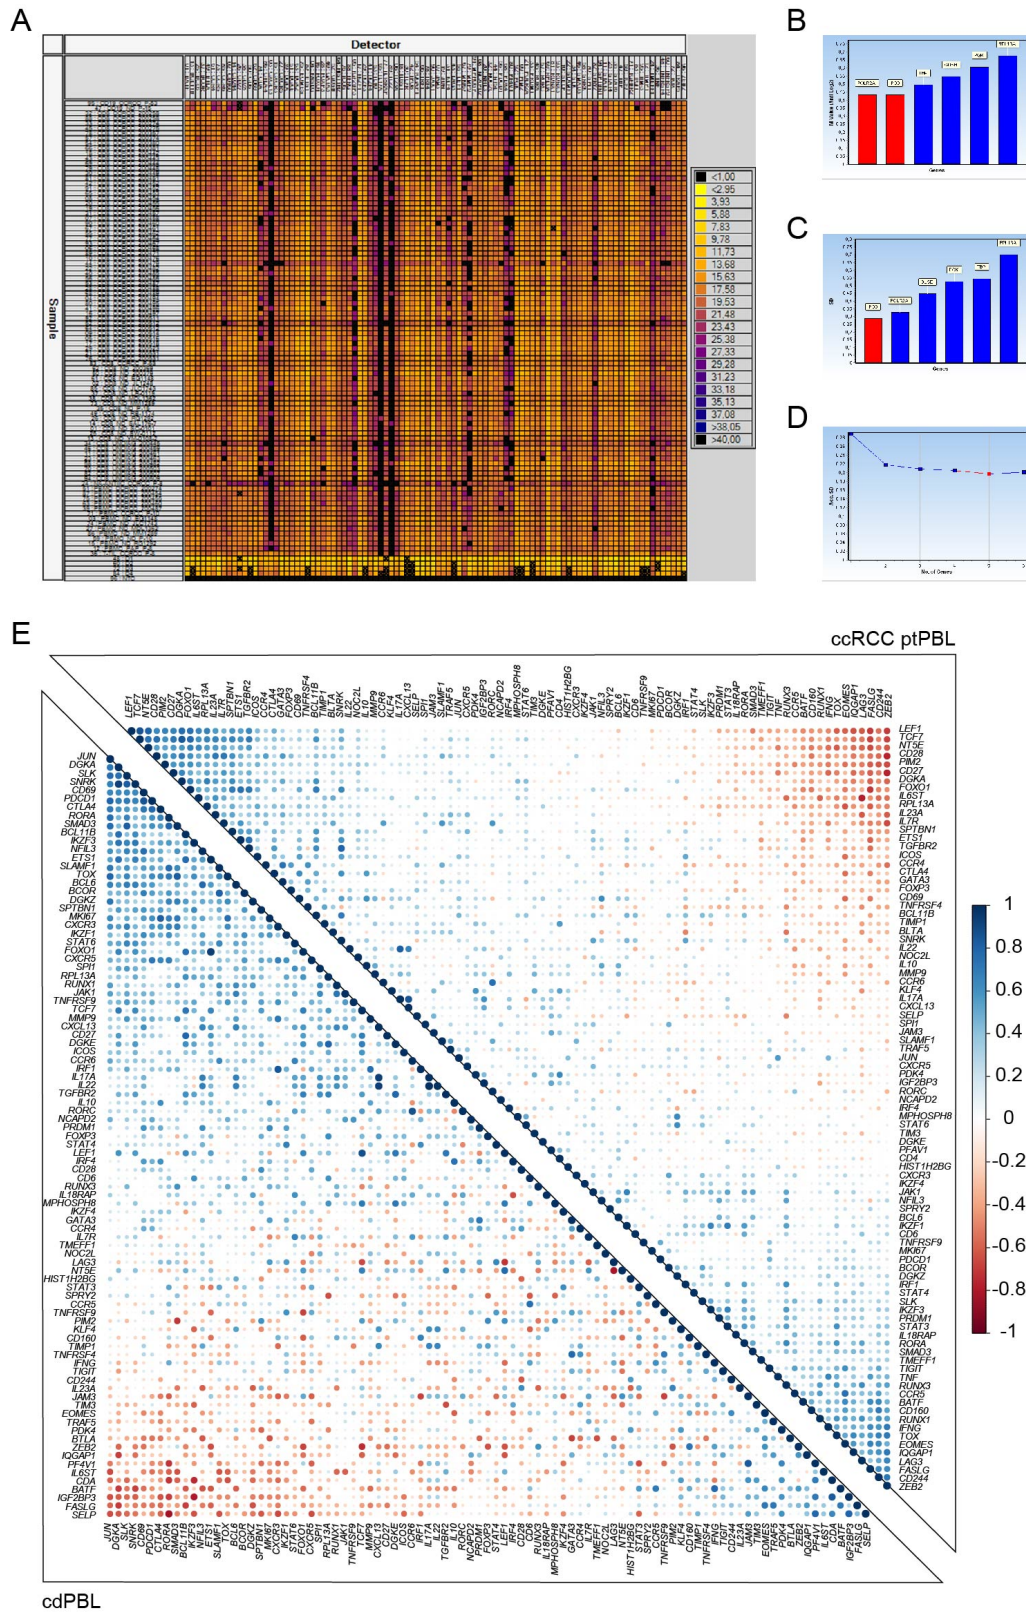



**Supplemental Figure S4: Validation and analysis of pan-cancer and polarizing CD8<sup>+</sup> DEGs across new RCC cohort.** (A) Demonstration of raw Biomark HD generated heatmap providing evidence that all RNA samples and Taqman assays were successful (ladder on right, detection range), (B-D) graphical representation of housekeeping genes used for data normalization (*GUSB*, *IPO8*, *PGK*, *POL2RA*, *TBP*) and generation of  $\Delta$ CT values, where (B) are M-values generated by GeNorm for normalization of real-time quantitative RT-PCR data by geometric averaging of multiple internal control genes, and (C-D) are SD and Acc. SD (respectively) generated by Norm Finder algorithm for identifying optimal normalization genes. (E) Example of correlogram, created using algorithm and  $-\Delta$ CT normalized values from qRT-PCR validation, and used to find genes across CD8<sup>+</sup> cdPBL and CD8<sup>+</sup> ccRCC ptPBL validation cohorts that would distinguish possible pan-cancer DEG clusters that would permit efficient stratification of patients according to CD8 ptPBL (Spearman method, coexpression coefficient ladder on right). ccRCC, clear cell renal cell carcinoma; pt, patient; nd, normal donor; PBL, peripheral blood mononuclear cells.

Figure S5

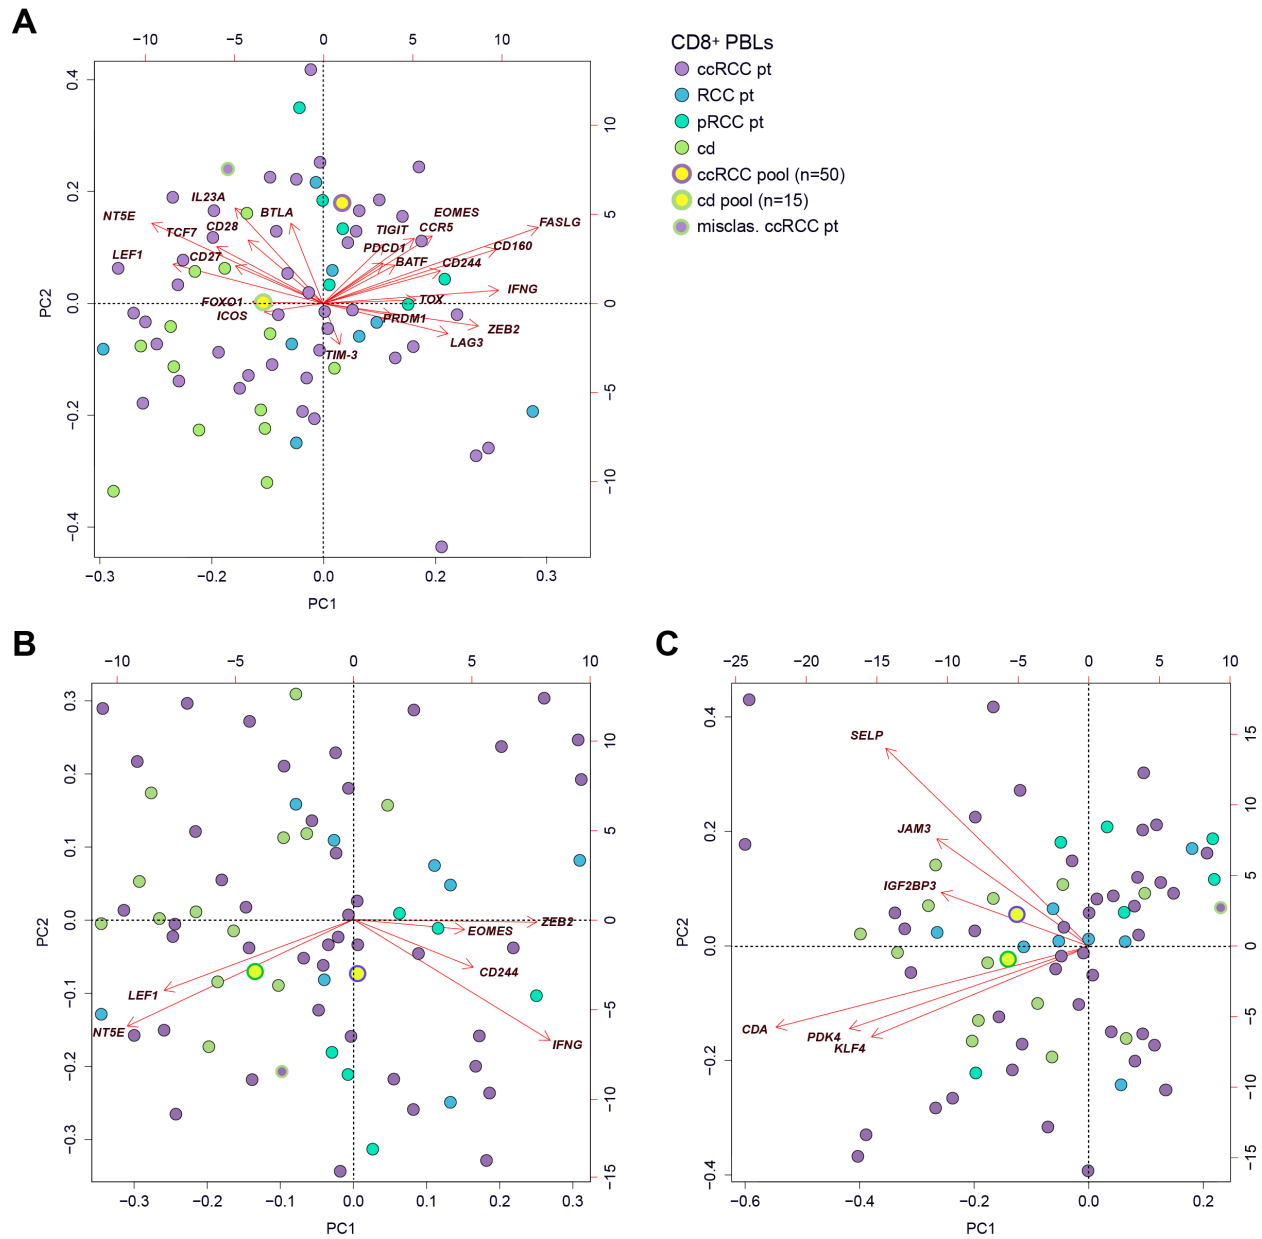

**Supplemental Figure S5: Independent pan-cancer, adhesion, or T cell polarizing gene groups from minimal 32- or 12-gene sets are unable to stratify patients from normal donors.** From **Figure 6A**, (A) Loss of patient stratification from removal of pan-cancer (*PF4V1*, *CDA*, *PDK4*, *KLF4*, *PIM2*, *TIMP1*, *IGF2BP3*, and adhesion (*JAM3*, *SELP*) DEGs from 32 DEG stratifying signature. From **Figure 6B**, pan-cancer and adhesion markers were analyzed independently from other T cell polarizing DEGs. Normalized  $-\Delta\text{CT}$  qRT-PCR expression values from individual CD8<sup>+</sup> T cells isolated from cdPBMC and ptPBMC (PBL) from patients undergoing surgery following RCC diagnosis, were used for principal component analysis (PCA) using applying the euclidean distance metric and complete linkage clustering method (R programming language; R-studio) ( $n = 69$ ). (B) Independently assessed top plus bottom PCA DEG groups from **Figure 6B** (*ZEB2*, *EOMES*, *CD244*, *IFNG*, *LEF1*, *NT5E*) are insufficient for stratifying patients from normal donors. (C) Independently assessed mid-left PCA DEG group from **Figure 6B** (*CDA*, *PDK4*, *KLF4*, *IGF2BP3*, *JAM3*, *SELP*) are insufficient for stratifying patients from normal donors. ccRCC, clear cell renal cell carcinoma; pRCC, papillary renal cell carcinoma; RCC, renal cell carcinoma; pt, patient; nd, normal donor; misclas., misclassified benign kidney lesion; n, number of patients in pool.

Figure S6

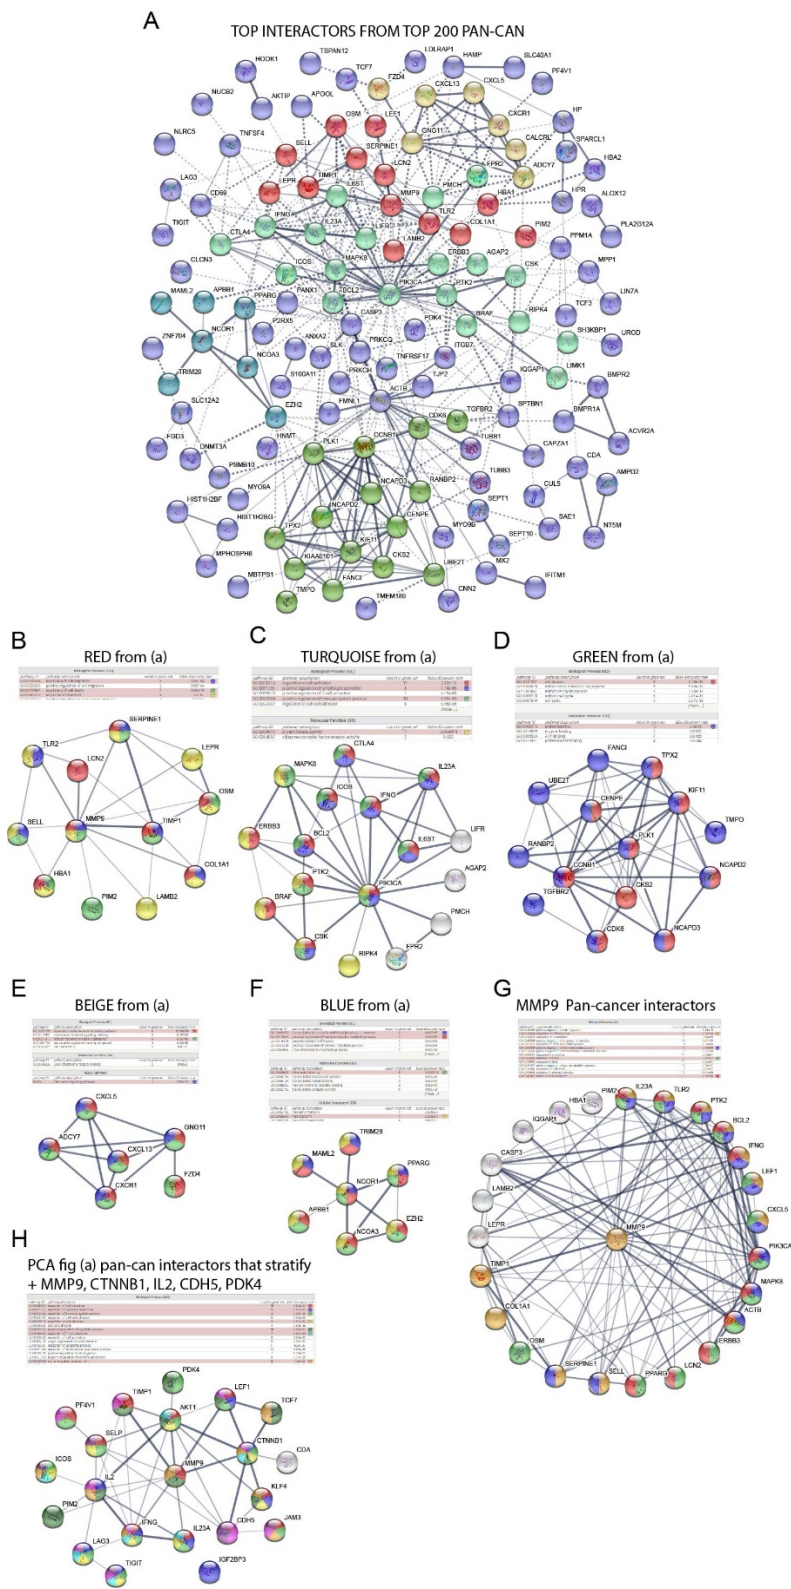

**Supplemental Figure S6. Protein-Protein interaction of top 200 pan-cancer DEGs provide insights on core target pathways and intra pathway linkages.** (A) Protein-protein interaction (PPI) primary pathways and connecting networks between the top 200 DEGs discovered, with high PPI enrichment value of  $P = 1.85e-10$  (String software, v10.5). Unsupervised arrangement and highlighting of distinct pathways in PPI are expanded in **B-G**. (B) MMP9, TIMP1 and SERPINE1 are central to regulation of cell death and migration pathways. (C) PIK3CA, IFNG, ICOS, BCL2, and CSK are central to cell adhesion and lymphocyte activation pathways. (D) CCNB1, PLK1 and CENPE are central to cell division pathway. (E) CXCL13, CXCR1, and CXCL5 are central to chemokine signaling pathways. (F) NCOR1 is central to positive regulation of transcription cellular pathways. (G) MMP9 interacts with more than any other pan-cancer gene, and is a central node of many pathways bridging cell migration and immune system processes (supervised clustering). (H) PPI matrix of the pan-cancer DEGs found capable of stratifying patients from normal donors with addition of CTNNA1, IL2, CDH5, and PDK4, involve immune system, cytokine, activation, migration, adhesion and apoptotic cellular pathways.

### Figure S7

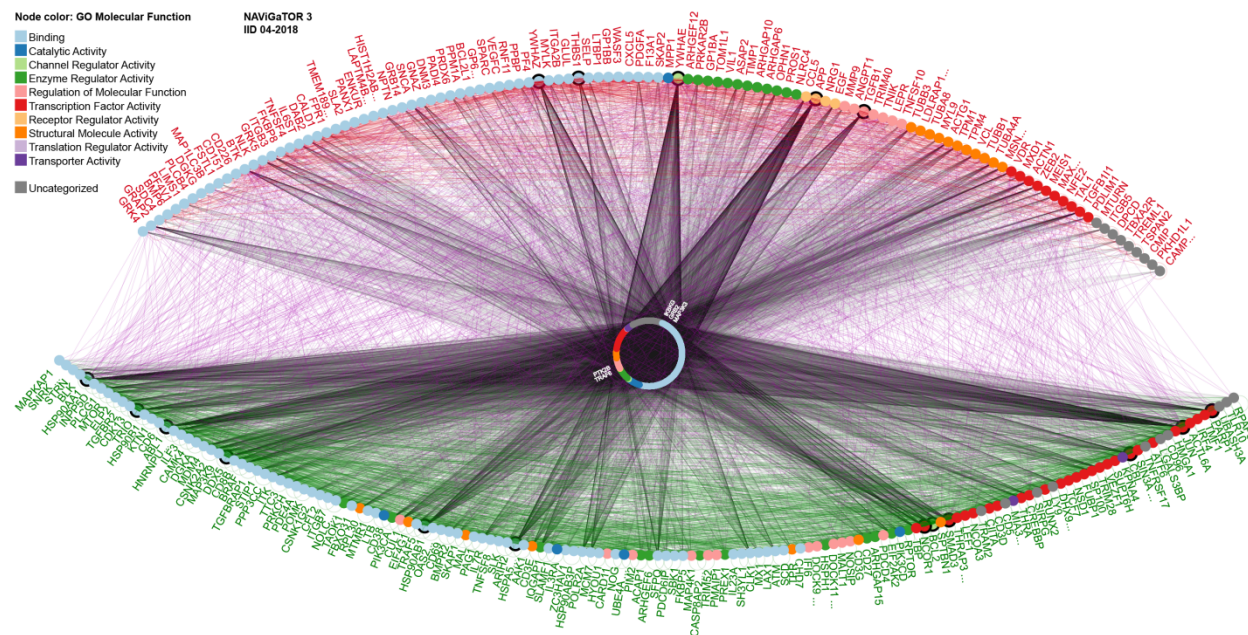

**Figure S7. Complete ccRCC ptPBL PPI.** Network of all protein-protein interactions (PPIs) among all ccRCC ptPBL DEGs. PPIs obtained from IID ver. 04-2018 and network visualization in NAViGaTOR ver. 3. DEGs increased and decreased in expression and their interacting edges are colored red and green, respectively to demonstrate groupings of these two pan-cancer subclasses, mauve lines highlight interactions between them, and grey lines highlight other protein mediators identified by IID ver. 04-2018. DEG nodes are colored according to GO Molecular Functions described in the legend. Black outline on nodes represents DEGs with the highest number of interacting partners in this network.

Figure S8

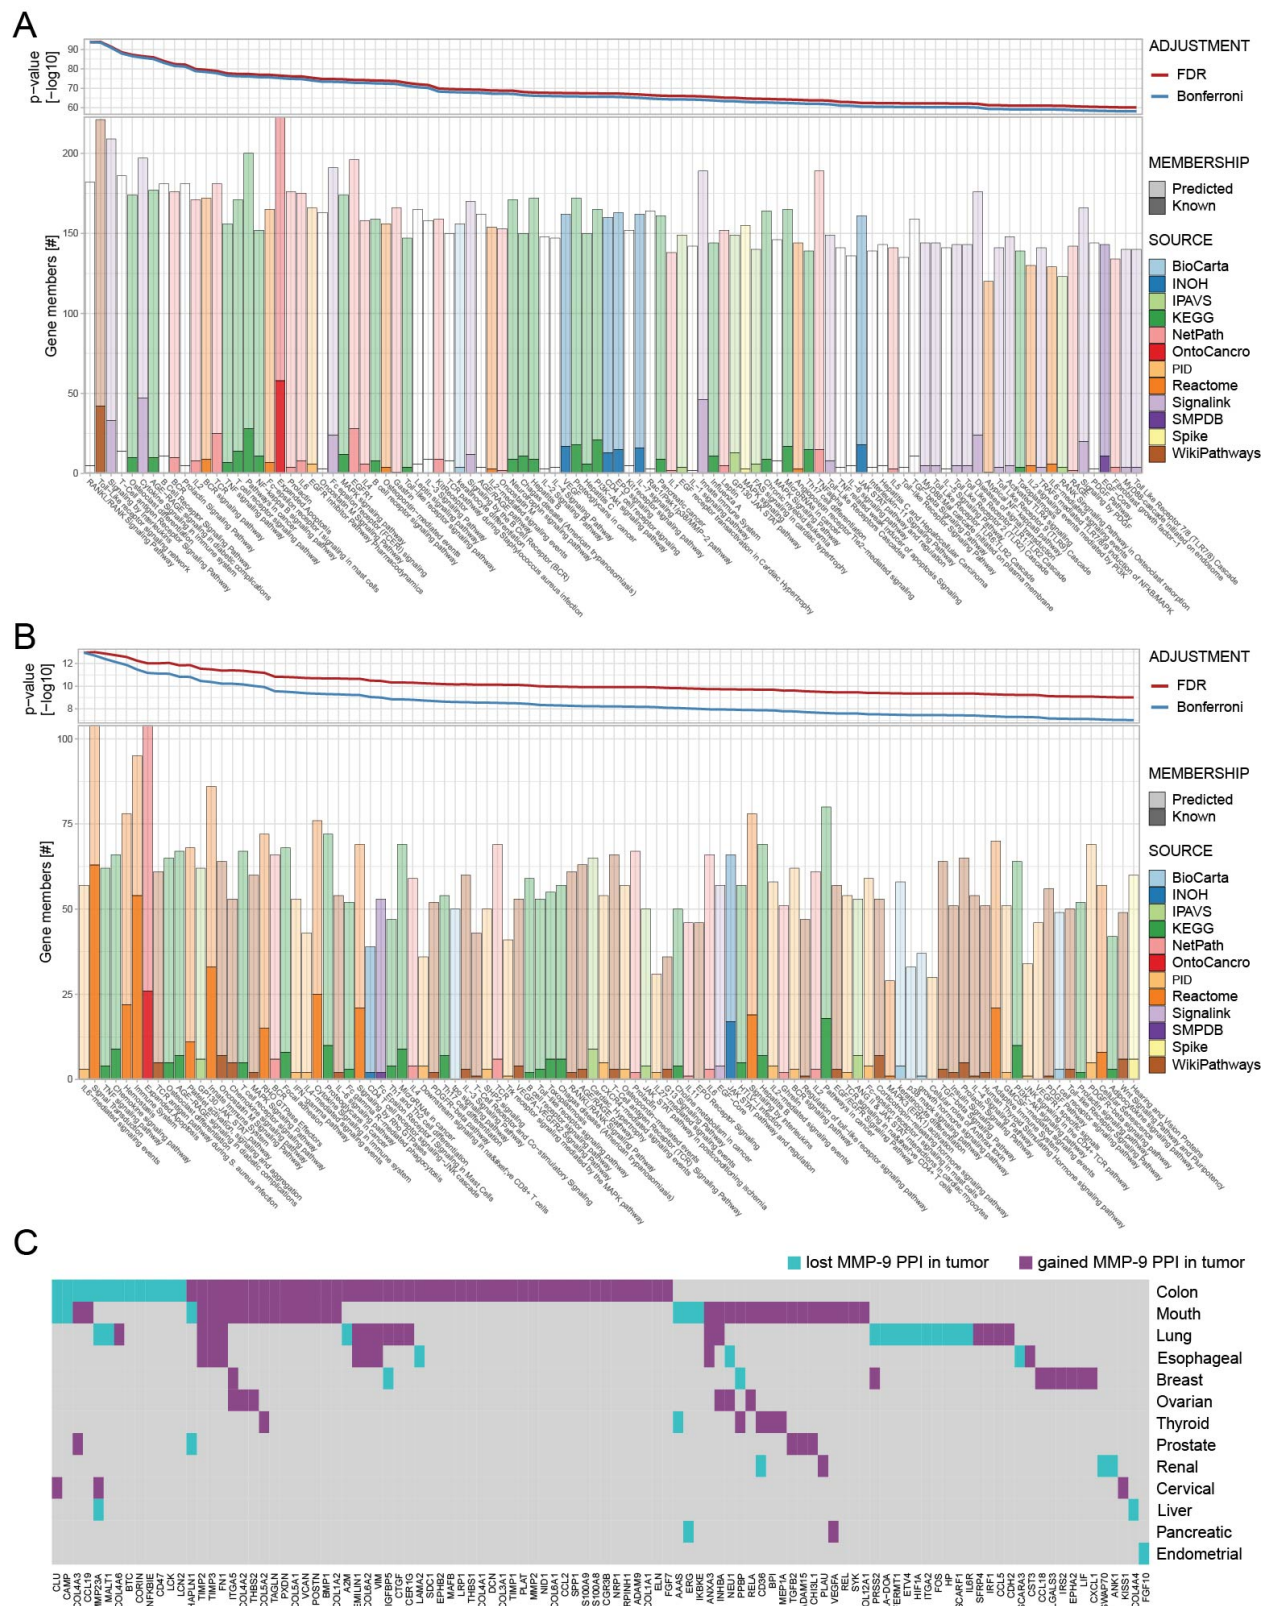

**Supplemental Figure S8. MMP-9 extended pathway analyses. (A-B)** Results of the pathway enrichment analysis as obtained from pathDIP ver. 3 for all ptPBL. MMP-9 pathways associated ptPBL DEGs from pathDIP matrix were correlated, and DEGs which were significantly associated to MMP9 positive pathways ( $p < 0.05$ ) were used for pathway scoring and classification. Pathway enrichment analysis graphs depicting results of pathDIP analysis for MMP-9 significant pathway interactors found from correlation analyses. Upper panels shows significance of enrichment obtained for individual pathways expressed as p-value ( $-\log_{10}$ ) adjusted for multiple testing by applying FDR (red) and Bonferroni (blue) methods. Lower barplot shows size of the overlap between query genes and members of individual pathways. Respective numbers of known and predicted pathway members are distinguished by the opacity, and fill color indicates original source of the given pathway. Plots are restricted to top 100 most significantly enriched pathways (full list is found in **Supplemental File S1**). **(C)** Differential gained and lost PPIs of MMP9 in cancers. Gained and lost PPIs of MMP9 in thirteen epithelial tissues-cancers suggesting its tissue-specific role in cancer. MMP9 has 106 disrupted PPIs, 60 of which are specific to only one tissue-cancer. It has the highest number of disrupted PPIs in colorectal, mouth and lung cancers (60, 36, and 29 PPIs, respectively) followed by esophagus with 11 PPIs.



Figure S9

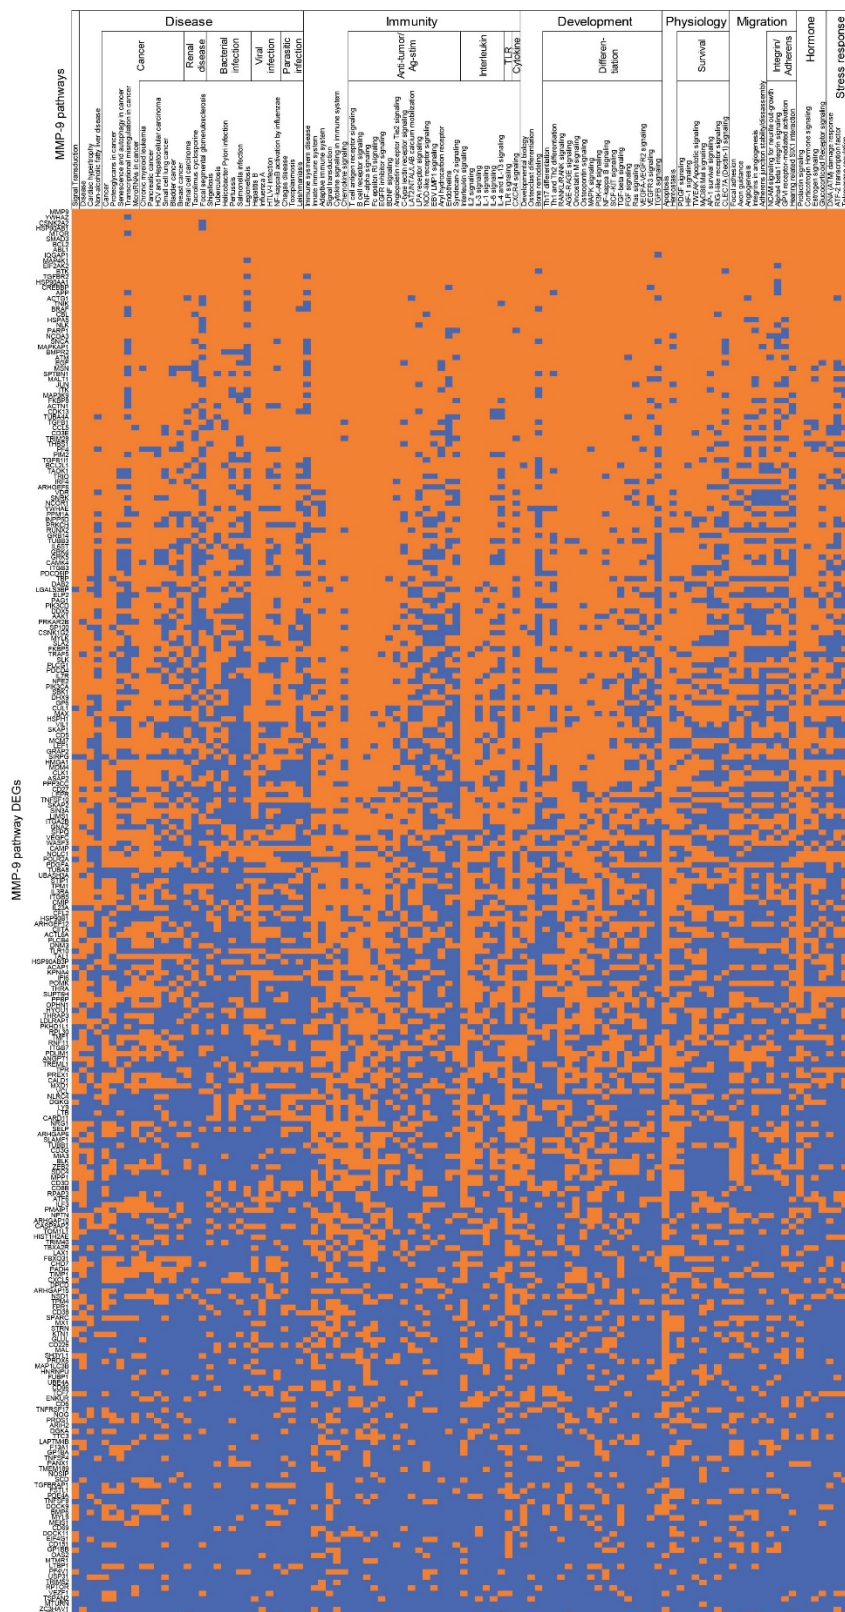

**Supplemental Figure S9. MMP9 full pathways DEGs from Figure 7C.** Supervised heatmap organizing main correlating MMP-9-pathway genes and associated pathways featuring disease and immunity, followed by differentiation, survival, and migration pathways. Orange, DEG represented in the pathway; blue DEG not represented in the pathway.

**Supplemental Tables** (see Supplemental materials Supplemental Tables for .xlsx file format):

**Table S1**

| <b>Table S1: Clinicopathological patient parameters.</b> |          |      |
|----------------------------------------------------------|----------|------|
| No. patients enrolled in study                           |          | 79   |
| Surviving patients                                       |          | 76   |
| tumor size (median, mm)                                  |          | 54.5 |
| Patient age (median, yrs)                                |          | 62.5 |
| Control donor age (median, yrs)                          |          | 59   |
| Patient Parameters                                       | <i>n</i> | %    |
| <b>Gender</b>                                            |          |      |
| Male                                                     | 58       | 73.4 |
| Female                                                   | 21       | 26.6 |
| <b>Histological subtype</b>                              |          |      |
| ccRCC                                                    | 51       | 64.6 |
| RCC                                                      | 16       | 20.2 |
| pRCC                                                     | 12       | 15.2 |
| <b>ICD-O Grade †</b>                                     |          |      |
| 1                                                        | 1        | 1.3  |
| 2                                                        | 16       | 20.3 |
| 3                                                        | 45       | 57.0 |
| 4                                                        | 12       | 15.2 |
| 9                                                        | 5        | 6.3  |
| <b>Clinical TNM</b>                                      |          |      |
| I                                                        | 43       | 54.4 |
| II                                                       | 7        | 8.9  |
| III                                                      | 13       | 16.5 |
| IV                                                       | 10       | 12.7 |
| UNKN                                                     | 6        | 7.6  |
| <b>TNM-T</b>                                             |          |      |
| T1                                                       | 45       | 57.0 |
| T2                                                       | 11       | 13.9 |
| T3                                                       | 16       | 20.3 |
| T4                                                       | 1        | 1.3  |
| Tx                                                       | 6        | 7.6  |
| <b>TNM-N</b>                                             |          |      |
| N0                                                       | 70       | 88.6 |
| N1                                                       | 5        | 6.3  |
| Nx                                                       | 4        | 5.1  |
| <b>TNM-M</b>                                             |          |      |
| M0                                                       | 68       | 86.1 |
| M1                                                       | 9        | 11.4 |
| Mx                                                       | 2        | 2.5  |
| <b>Laterality</b>                                        |          |      |
| left                                                     | 39       | 49.4 |
| right                                                    | 40       | 50.6 |
| <b>Invasive Tumor Necrosis</b>                           |          |      |
| Neg                                                      | 37       | 46.8 |
| Pos                                                      | 31       | 39.2 |
| UNKN                                                     | 11       | 13.9 |
| <b>Family history of cancer</b>                          |          |      |
| Yes                                                      | 15       | 19.0 |
| No                                                       | 17       | 21.5 |
| UNKN                                                     | 47       | 59.5 |

**Supplemental Table S1. Clinicopathological patient parameters.** Patients and normal donors enrolled in the study. mm, millimeter; yrs, years; *n*, number of patients, %, percentage of total patients; ccRCC, clear cell renal cell carcinoma; pRCC, papillary renal cell carcinoma; RCC, renal cell carcinoma; ICD-O, International Classification of Diseases for Oncology; UNKN, unknown.

Supplemental Figures and Tables: Running title: Pan-Pathology targets of the failed immune response

**Table S2**

| Table S2: Non-redundant pan-cancer DEGs expressed in T/B cells |                              |                        |                                        |
|----------------------------------------------------------------|------------------------------|------------------------|----------------------------------------|
| Pan-cancer DEG                                                 | Evidence in T/B cells (PMID) | Pan-cancer DEG (cont.) | Evidence in T/B cells (PMID) (cont.)   |
| ACTB                                                           | 22343534                     | MMAA                   | 21943286                               |
| ACVR2A                                                         | 22056434                     | MMP9                   | 28280358                               |
| ADCY7                                                          | 17950003                     | MPP1                   | 21434872                               |
| AKTIP (AKT1)                                                   | 20042722                     | MTHFD2                 | 27325891                               |
| ALOX12                                                         | 24341289; 18046341           | MX2                    | 27256343                               |
| AMPD2                                                          | 2394745                      | MYO9A (myosin IXA)     | 24646736                               |
| ANKRD22                                                        | 21347333                     | MYO9B                  | 24646736                               |
| ANXA2                                                          | 8898868                      | NCAPD2                 | 28057211                               |
| APBB1 (FE65)                                                   | 15563829                     | NCAPD3                 | 27737961                               |
| ARHGAP18                                                       | 25207815                     | NCOA3                  | 27111144; 22942430                     |
| ARHGAP4                                                        | 24679343                     | NCOR1                  | 28288100                               |
| ARHGEF9 (CDC42)                                                | 16439548                     | NLRCS                  | 28615208                               |
| ATL1                                                           | 28240257                     | NUCB2                  | 25880808                               |
| BCL2                                                           | 1924327                      | OSM                    | 8816418                                |
| BMPRI1A                                                        | 24350726; 24240189           | P2RX5                  | 11396717; 25181038                     |
| BMPRI2                                                         | 21868697                     | P2RY8                  | 25880808                               |
| BRAF                                                           | 9207797; 21169256            | PACS1                  | 12855553                               |
| CALCRL                                                         | 22843730                     | PANX1                  | 25301274; 24642372; 20660288; 20884646 |
| CAPZA1                                                         | 28585036                     | PF4V1 (CXCL4L1)        | 27828999; 23704819                     |
| CASP3                                                          | 28487480                     | PIK3CA (PI3K)          | 28685820; 23378844                     |
| CCNB1                                                          | 22950819                     | PIM2                   | 25987564                               |
| CD69                                                           | 19841192                     | PLEKHA1                | 15626471                               |
| CDA                                                            | 7904595                      | PLK1                   | 22609854                               |
| CDC42SE1                                                       | 25547673                     | PMCH                   | 23775959                               |
| CDCP1 (Trask; CDC42)                                           | 21559459                     | PPARG                  | 24921943                               |
| CDK6                                                           | 27915416                     | PRKCH                  | 17195206; 25617472                     |
| CDKL5                                                          | 17589290                     | PRKCQ                  | 28152304; 26390157                     |
| CENPE (KIF10)                                                  | 23980113                     | PSMB10 (MECL1)         | 18025207                               |
| CETP                                                           | 15228446                     | PTK2 (FAK)             | 24816556                               |
| CLEC4D (CLECSF8)                                               | 23606632                     | PTPRCAP                | 9880514                                |
| CNN2                                                           | 23499442; 26046660           | RANBP2 (Nup358)        | 19922867                               |
| CRYAB                                                          | 23736536                     | RIPK4                  | 26522402                               |
| CSK                                                            | 28522807                     | RORA                   | 22561605                               |
| CTLA4                                                          | 10101680                     | S100A11                | 16351635                               |
| CUL5                                                           | 27307564; 17449237           | SAA2                   | 25847238                               |
| CXCL13                                                         | 19095563                     | SAE1                   | 25143484                               |
| CXCL5                                                          | 28003642; 25130611           | SELL                   | 19654311                               |
| CXCR1                                                          | 12707326                     | SEPT1                  | 19043408                               |
| DGKE                                                           | 18689679                     | SEPT10                 | 18077723                               |
| DNMT3A                                                         | 27582468; 27690235           | SH3KBP1 (CIN85)        | 21708930                               |
| DOCK9                                                          | 23396170; 19898472           | SH3YL1                 | 22927640                               |
| ERBB3                                                          | 20668683                     | SIGLEC1                | 22192781                               |
| EZH2                                                           | 28490575                     | SIGLEC12               | 27548433                               |
| FGD6                                                           | 18838382                     | SIPA1L1                | 12958214; 17702895                     |
| FMNL1                                                          | 23874337                     | SLC12A2                | 27400149                               |
| FNBP4                                                          | 27835906                     | SLK                    | 19255442                               |
| FPR2 (ALX)                                                     | 24166736                     | SNRK                   | 27936095; 18927432                     |
| FZD4                                                           | 21549744                     | SORL1                  | 26487345                               |
| GAS2L3                                                         | 23469016                     | SPARCL1                | 27085068                               |
| GNP11                                                          | 15914583; 20670477           | SPTBN1                 | 15965501; 12354383; 21877118           |
| HAMP                                                           | 23647063                     | TBC1D10C (EPI64C)      | 18450757; 27021007                     |
| HBA1 (CD31)                                                    | 14701691; 23761922           | TCF3                   | 25990863; 23396170                     |
| HIST1H2BF                                                      | 27213115                     | TCF7                   | 27111144                               |
| HIST1H2BG                                                      | 27371728                     | TCIRG1 (TIRCT)         | 15294947                               |
| HOOK1                                                          | 12791665                     | TGFBR2                 | 24098055; 25677619; 28472799           |
| HP (haptaglobin)                                               | 10664448; 12562322           | THSD7A                 | 28669992                               |
| HPR                                                            | 9673399                      | TIGIT                  | 19011627                               |
| ICOS                                                           | 11343121                     | TIMP1                  | 18502033                               |
| IFITM1 (Leu-13)                                                | 9597125                      | TLR2                   | 27622036                               |
| IFNG                                                           | 25480562                     | TMEFF1 (tomoregulin-1) | 25380171; 18523280; 12618130           |
| IGF2BP3                                                        | 27881740                     | TMEM189                | 27371726                               |
| IL23A                                                          | 16688182                     | TMPO                   | 9199966                                |
| IL6ST                                                          | 20951741                     | TNFAIP2                | 21921781                               |
| IQGAP1                                                         | 22573807                     | TNFRSF17               | 29504446                               |
| ITGB7                                                          | 20926792                     | TNFSF4 (OX40-L)        | 10586044; 8076595                      |
| KIF11                                                          | 27875993                     | TPX2                   | 27910998; 14701852                     |
| LAG3                                                           | 25780040                     | TRAF1                  | 22570473                               |
| LCN2                                                           | 26671823; 25010215           | TREML1                 | 16670310                               |
| LDLRAP1                                                        | 21918187                     | TRIM28                 | 23169648; 22544392                     |
| LEF1                                                           | 27111144                     | TRPM2                  | 26300888                               |
| LIFR                                                           | 25514345                     | TSPAN12                | 20159112                               |
| LIMK1                                                          | 11784854                     | TUBB1                  | 19583510                               |
| LPPR2                                                          | 21939632                     | TUBB3                  | 26028645; 20220512                     |
| MAML2                                                          | 17699740                     | UNC119B                | 14757743                               |
| MAPK8 (JNK)                                                    | 14563325                     | ZNF385A                | 22945289                               |
| MAST4                                                          | 18650832                     | ZNF704                 | 24086395                               |
| MBTPS1 (S1P)                                                   | 21402380                     |                        |                                        |

**Supplemental Table S2. Non-redundant pan-cancer DEGs expressed in T/B cells.** Pan-cancer DEGs discovered from ccRCC ptPBL and TIL from profiling TCGA, GEO and EGA, ccRCC, NSCLC, BC, GI and OV cancers datasets using KM plotter. From a Total of 467 DEGs discovered (see **Supplemental Figure S1**), those that have been cited in the literature as being expressed by T or B cells are shown here, with redundancies of DEGs discovered as expressed in both isolates merged for simplicity of table presentation. Common names are shown in brackets in some instances. PMID, Pubmed ID.

Supplemental Figures and Tables: Running title: Pan-Pathology targets of the failed immune response

**Table S3**

**Table S3: Top 100 Pan-cancer DEGs with scoring and literature**

| ptPBL DEG            | pan-cancer score (%) | correlation score (%) | Gene name                  | ptPBL PMID    | TIL DEG         | pan-cancer score (%) | Gene name              | TIL PMID    |
|----------------------|----------------------|-----------------------|----------------------------|---------------|-----------------|----------------------|------------------------|-------------|
| <b>TREML1</b>        | 41                   | 0                     | Triggering receptor exp    | 16670310      | <b>PMCH</b>     | 56                   | Pro-melanin-concentr   | 23775959    |
| <b>PF4V1</b>         | 61                   | 29                    | CXCL4L1/C-X-C motif        | 23704819      | <b>IFNG</b>     | 46                   | Interferon gamma       | 25480562    |
| <b>HBA1</b>          | 41                   | 0                     | CD31/Hemoglobin, alp       | 23761922      | <b>LAG3</b>     | 61                   | Lymphocyte-activatio   | 25780040    |
| <b>IL23A</b>         | 61                   | 29                    | Interleukin-23 subunit a   | 16688182      | <b>TMPO</b>     | 54                   | Thymopoietin           | 9199966     |
| <b>MPP1</b>          | 51                   | 29                    | Membrane protein, pal      | 21434872      | <b>TBC1D10C</b> | 21                   | TBC1 domain family,    | 18450757; 2 |
| <b>MMP9</b>          | 71                   | 43                    | Matrix metalloproteinase   | 28280358      | <b>CCNB1</b>    | 80                   | Cyclin B1              | 22950819    |
| <b>GNAS1</b>         | 46                   | 86                    | G protein gamma 11         | 15914563; 206 | <b>CENPE</b>    | 66                   | Centromere-associat    | 23980113    |
| <b>ARHGAP18</b>      | 46                   | 0                     | Rho GTPase activating      | 25207815      | <b>PIM2</b>     | 71                   | Pim-2 oncogene         | 25987564    |
| <b>PKK4</b>          | 46                   | 71                    | Pyruvate dehydrogenase     | n/a           | <b>NCAPD2</b>   | 100                  | CAP-D2/Non-SMC c       | 28457211    |
| <b>FPR2</b>          | 61                   | 29                    | Formyl peptide recept      | 24166736      | <b>PTPRCAP</b>  | 61                   | CD45-associated pro    | 9880514     |
| <b>LCN2</b>          | 51                   | 14                    | Lipocalin-2                | 25010215      | <b>EZH2</b>     | 73                   | Enhancer of zeste ho   | 28490575    |
| <b>HIST1H2BG</b>     | 83                   | 29                    | Histone cluster 1, H2bc    | 27371726      | <b>LIMK1</b>    | 76                   | LIM domain kinase 1    | 11784854    |
| <b>TIMP1</b>         | 80                   | 14                    | Tissue inhibitor of meta   | 18502033      | <b>TIGIT</b>    | 61                   | T cell immunorecepto   | 19011627    |
| <b>PPM1A</b>         | 24                   | 100                   | Protein phosphatase 1      | n/a           | <b>CASP3</b>    | 61                   | Caspase 3              | 28487480    |
| <b>TMEFF1</b>        | 80                   | 14                    | Tomoregulin-1              | 18523280; 126 | <b>TPX2</b>     | 86                   | TPX2, microtubule-as   | 27910998; 1 |
| <b>IGF2BP3</b>       | 66                   | 43                    | Insulin-like growth fact   | 27881740      | <b>TRPM2</b>    | 80                   | Transient receptor po  | 26300888    |
| <b>PANX1</b>         | 54                   | 0                     | Pannexin-1                 | 25301274; 246 | <b>CSK</b>      | 90                   | C-src tyrosine kinase  | 28522807    |
| <b>LDLRAP1</b>       | 34                   | 57                    | Low density lipoprotein    | 21918187      | <b>PSMB10</b>   | 54                   | Proteasome subunit b   | 18025207    |
| <b>CDA</b>           | 80                   | 0                     | Cytidine deaminase         | 7904595       | <b>TNFAIP2</b>  | 80                   | Tumor necrosis factor  | 21921781    |
| <b>IL6ST</b>         | 66                   | 0                     | CD130/interleukin 6 sig    | 20951741      | <b>IFITM1</b>   | 61                   | Interferon induced tra | 9597125     |
| <b>CETP</b>          | 51                   | 14                    | Cholesteryl ester transf   | 15228446      | <b>MX2</b>      | 56                   | Interferon-induced GT  | 27256343    |
| <b>MYO9B</b>         | 41                   | 0                     | Myosin-ixb                 | 24646736      | <b>TCIRG1</b>   | 54                   | T-cell immune regulat  | 15294947    |
| <b>DGKE</b>          | 56                   | 0                     | Diacylglycerol kinase e    | 18689679      | <b>NCAPD3</b>   | 66                   | Non-SMC condensin      | 27737961    |
| <b>MPHOSPH8</b>      | 76                   | 86                    | M-phase phosphoprotei      | n/a           | <b>PLK1</b>     | 76                   | Polo-like kinase 1     | 22609854    |
| <b>PRKCH</b>         | 44                   | 0                     | Protein kinase C, eta      | 17195206; 256 | <b>ACTB</b>     | 61                   | Actin, beta            | 22343534    |
| <b>ADCY7</b>         | 44                   | 14                    | Adenylate cyclase 7        | 17950003      | <b>GAS2L3</b>   | 86                   | Growth arrest-specifi  | 23469016    |
| <b>IQGAP1</b>        | 66                   | 57                    | IQ motif containing GTP    | 22573807      | <b>ARHGAP4</b>  | 61                   | Rho GTPase activator   | 24679343    |
| <b>FMNL1</b>         | 51                   | 14                    | Leukocyte formin           | 23874337      | <b>HAMP</b>     | 66                   | Hepcidin               | 23647063    |
| <b>NCOA3</b>         | 34                   | 0                     | Nuclear receptor coact     | 27111144; 229 | <b>MTHFD2</b>   | 80                   | Methylenetetrahydrof   | 27325891    |
| <b>TNFRSF17</b>      | 57                   | 14                    | B-cell maturation prote    | 26370838; 245 | <b>KIF11</b>    | 80                   | Kinesin family membe   | 27875993    |
| <b>TCF3</b>          | 57                   | 86                    | Transcription factor 3     | 23396170      | <b>MAST4</b>    | 63                   | Microtubule-associat   | 18650832    |
| <b>NCOR1</b>         | 66                   | 0                     | Nuclear receptor co-reg    | 28288100      | <b>APBB1</b>    | 46                   | Amyloid beta A4 prot   | 15563829    |
| <b>BCL11B (ATL1)</b> | 46                   | 71                    | Alkyltransferase-like pr   | 28240257      | <b>UNC119B</b>  | 63                   | Protein unc-119 hom    | 14757743    |
| <b>ITGB7</b>         | 63                   | 29                    | Integrin beta-7            | 20926792      | <b>MMAA</b>     | 66                   | Methylmalonic aciduri  | 21943286    |
| <b>RANBP2</b>        | 66                   | 14                    | RAN binding protein 2      | 19922867      | <b>PTK2</b>     | 46                   | Focal adhesion kinase  | 24816556    |
| <b>SNRK</b>          | 66                   | 43                    | SNF related kinase         | 27936095; 189 | <b>PPARG</b>    | 63                   | Peroxisome proliferat  | 24921943    |
| <b>TGFBR2</b>        | 70                   | 71                    | Transforming growth fa     | 24098055; 256 | <b>BMPR1A</b>   | 66                   | Bone morphogenetic     | 24350726; 2 |
| <b>SLK</b>           | 76                   | 71                    | STE20-like kinase          | 19255442      | <b>SEPT10</b>   | 76                   | Septin 10              | 18077723    |
| <b>FNBP4</b>         | 34                   | 100                   | Formin binding protein     | 27835906      | <b>CUL5</b>     | 63                   | Cullin-5               | 27307564; 1 |
| <b>NUCB2</b>         | 46                   | 29                    | Nucleobindin 2             | 25880808      | <b>MAPK8</b>    | 76                   | Mitogen-activated pro  | 14563325    |
| <b>BRAF</b>          | 66                   | 0                     | Serine/threonine-prote     | 9207797; 2116 | <b>ACVR2A</b>   | 46                   | Activin receptor type- | 22056434    |
| <b>UBE2T</b>         | 61                   | 14                    | Cell proliferation-induc   | n/a           | <b>PPAP2A</b>   | 76                   | Phosphatidic acid ph   | 21576386    |
| <b>CD69</b>          | 47                   | 0                     | Early T-cell activation ir | 19841192      | <b>LIFR</b>     | 66                   | Leukemia inhibitory f  | 25514345    |
| <b>DOCK9</b>         | 54                   | 86                    | Dedicator of cytokinesi    | 23396170; 198 | <b>RORA</b>     | 56                   | RAR-related orphan r   | 22561605    |
| <b>SPTBN1</b>        | 86                   | 0                     | Spectrin, non-erythroid    | 15965501; 123 | <b>TSPAN12</b>  | 66                   | Tetraspanin 12         | 20159112    |
| <b>PIK3CA</b>        | 46                   | 71                    | PI3K/phosphoinositide      | 28685820; 233 | <b>PLEKHA1</b>  | 56                   | Pleckstrin homology c  | 15626471    |
| <b>SH3YL1</b>        | 46                   | 14                    | SH3 domain-containing      | 22927640      | <b>SIPA1L1</b>  | 66                   | Signal-induced prolife | 12958214; 1 |
| <b>SORL1</b>         | 56                   | 14                    | Sortilin-related recepto   | 26487345      | <b>AKTIP</b>    | 46                   | AKT interacting prote  | 20042722    |
| <b>LEF1</b>          | 41                   | 0                     | Lymphoid enhancer-bir      | 27111144      | <b>ZNF704</b>   | 46                   | Zinc finger protein 70 | 24086395    |
| <b>SLC12A2</b>       | 56                   | 0                     | Solute carrier family 12   | 27400149      | <b>FZD4</b>     | 56                   | Frizzled homolog 4     | 21549744    |

**Supplemental Table S3. Top 100 Pan-cancer DEGs with scoring and literature.**

Top 100 Pan-cancer DEGs selected from 4-pronged scoring system (see Supplemental fig. S1). Red highlighted DEGs are increased in expression, whereas green highlighted DEGs are decreased in expression in training set ccRCC. Dark red or green highlighted DEGs are interactors (e.g., Figure 3). Underlined are common to both PBCM and TIL. Bold DEG gene names are only expressed in lymphoid/myeloid tissues and are modified in expression across 17 cancers (The Protein Atlas). Pan-cancer scores from increased or decreased in tumor relative to normal tissues, and positive or negative effect on overall survival (scores >50% are highlighted). Correlation scores are calculated from ccRCC microarrays (scores >0% are highlighted according to degree). Gene names added in instances where PMID uses this notation. PMID, Pubmed ID. ptPBL listed DEGs are genes discovered from ccRCC training microarray dataset where DEG was higher in ptPBL than cdPBL. TIL listed DEGs are genes discovered from ccRCC training microarray dataset where DEG was higher in TIL than TIIC (-1.5 to 1.5 Fold-change cut-off; FDR  $P = 0.05$ ).

Supplemental Figures and Tables: Running title: Pan-Pathology targets of the failed immune response

Table S4

**Table S4: Selected Pan-cancer and T cell polarizing DEGs for validation**

| Gene      | Clonal                            | Aliases             | Assay ID             | Lymph          | Oth                  | Function classification                | Functions                                                                             | Pan-can fun                                                       | PMID       | Pan-can-PMCID                 |
|-----------|-----------------------------------|---------------------|----------------------|----------------|----------------------|----------------------------------------|---------------------------------------------------------------------------------------|-------------------------------------------------------------------|------------|-------------------------------|
| BATF      | Basic leucine zipper tra          | Q18520              | BATF1, SFA2          | Hs00232390_m1  | CD4, CD8             | Transcription factor                   | Transcription factor, negative regulator of B-cell-activating trans                   |                                                                   |            |                               |
| BCL11B    | B-cell CLL/Lymphoma 1             | Q9C000              | ATL1, CTIP2, RIT1    | Rh02853704_m1  | CD8                  | Transcription factor                   | Transcription factor, T-cell differentiation, neg. regulation of apoc                 |                                                                   |            |                               |
| BCL6      | B-cell CLL/Lymphoma 6             | P41182              | LAZ3                 | Hs00153368_m1  | CD4, CEB             | Transcription factor                   | Transcription factor, transcription of STAT Th1 master regulator                      |                                                                   |            |                               |
| BCOR      | BCL6 corepressor                  | Q6W2J9              | ANOP2, MAA2, MCOH    | Hs00372378_m1  | CD8                  | Transcription factor                   | Corepressor of BCL6                                                                   |                                                                   |            |                               |
| BTLA      | B and T lymphocyte a              | Q726A9              | CD272, BTLA1         | Hs00699198_m1  | CD4, CEB             | Inhibitory TCR corec                   | Inhibitory signal                                                                     |                                                                   |            |                               |
| CCR4      | C-C motif chemokine re            | P51679              | CD194, CKR4, CMKB    | Hs00356611_s1  | CD4 mp               | Cytokine/chemokine r                   | Receptor for MIP-1, RANTES, TARC and Th17, Th22                                       |                                                                   |            |                               |
| CCR5      | C-C motif chemokine re            | P51681              | CD195, CKR5, CMKB    | Hs00999149_s1  | CD4, CEB, DC         | Cytokine/chemokine r                   | Receptor for MCP-2, MIP-1 $\alpha$ , MIP-1 $\beta$ and RANTES                         |                                                                   |            |                               |
| CCR6      | C-C motif chemokine re            | P51684              | CD196, CKR6, CMKB    | Hs01189070_s1  | CD4, CEB, DC         | Cytokine/chemokine r                   | Receptor for MIP-3 $\alpha$                                                           |                                                                   |            | Th17, Th22                    |
| CD160     | CD160 molecule                    | Q95971              | BY55, NK1, NK28      | Hs00198994_m1  | CD8                  | NK                                     | Inhibitory TCR corec                                                                  | Tightly associated with peripheral blood NI                       |            | Generation and maint          |
| CD244     | CD244 molecule                    | P28842              | 2B4, NKR2B4, SLAMF   | Hs00175569_m1  | CD4, CCNK, m         | Inhibitory TCR corec                   | Activation, cytokine production, adhesion a inhibitory role on M. t                   |                                                                   |            |                               |
| CD27      | CD27 molecule                     | Q20292S             | TNFRSF7              | Hs00368691_1   | CD4, CEB, NK         | Surface protein                        | Costimulation signal                                                                  |                                                                   |            |                               |
| CD28      | CD28 molecule                     | P10747              | TP44                 | Hs01007422_m1  | CD4, CC              | plasm                                  | Activating TCR corec                                                                  | Costimulation and proliferation of T cells following CD80/86 enga |            |                               |
| CD6       | CD6 molecule                      | P30203              | TP120                | Hs00198752_m1  | CD4, CEB             | Surface protein                        | Adhesion, T-cell and APC interactions                                                 |                                                                   |            |                               |
| CD69      | CD69 molecule                     | Q07108              | AIM, BL-AC/P26, CLE  | Hs00934033_m1  | CD4, CEB, NK         | Activating TCR corec                   | Activation, cytokine production, NK-mediated lysis                                    |                                                                   |            |                               |
| CDA       | cytidine deaminase                | P32320              | CDD                  | Hs00156401_m1  |                      | Metabolism                             | CDA expression 27601591                                                               | CDA and A2727621                                                  |            |                               |
| CTLA4     | cytotoxic T-lymphocyte P16410     | ALP55, CD, CD152, C | Hs03044418_m1        | CD4, CEB       | Inhibitory TCR corec | Inhibitory signal to T cells           |                                                                                       |                                                                   |            | expressed by Th, B, I         |
| CXCL13    | C-X-C motif chemokine O43927      | ANGIE, ANGIE2, BCA  | Hs00757930_m1        | CD8            | Cytokine/chemokine r | B-cell chemotaxis, homing to follicles |                                                                                       |                                                                   |            |                               |
| CXCR3     | C-X-C motif chemokine P49682      | CD182, CD183, CKR   | Hs01847760_s1        | CD4, CCNK, m   | Cytokine/chemokine r | Receptor for IL-8                      |                                                                                       |                                                                   |            | Th1                           |
| CXCR5     | C-X-C motif chemokine P32302      | CD185, BLR1, MDR1   | Hs00540548_s1        |                | Cytokine/chemokine r | Receptor for BLC                       | B-cell migration                                                                      |                                                                   |            | Th                            |
| DGK1      | diacylglycerol kinase a           | P23743              | DAGK, DAGK1          | Hs01549928_s1  | CD4, CD8             | Metabolism                             | Signaling molecule                                                                    |                                                                   |            |                               |
| DGKE      | diacylglycerol kinase e           | P52429              | AHUS7, DAGK5, DAG    | Hs00177637_m1  | CD4, CD8             | Signaling                              | regulate TCR s 1 9E+07                                                                |                                                                   |            | might be 5065962              |
| DGKZ      | diacylglycerol kinase z           | Q13574              | DAGK5, DAGK6, DG     | Hs01632414_s1  | CD4, CD8             | Signaling                              | Negative regulation of Ras signaling, migration, mitotic G1 DNA c                     |                                                                   |            |                               |
| EOMES     | eomesodermin                      | Q95936              | TBR2                 | Hs00172872_m1  | CD4                  | Transcription factor                   | Transcription factor, adaptive immunity, T-associated with termi                      |                                                                   |            |                               |
| ETS1      | ETS proto-oncogene 1              | P14921              | P54, ETS-1, EWSR2    | Hs04282931_m1  | CD4, CD8             | Transcription factor                   | differentiation, Transcription factor, angiopoietin Th1 and inhibi                    |                                                                   |            |                               |
| FASLG     | Fas ligand                        | P48023              | ALPS1B, APT1LG1, A   | Hs00181225_m1  | CD4, CCNK, ne        | Apoptosis                              | Apoptosis triggered by binding to FAS                                                 |                                                                   |            | Cytolytic CD4 T cells         |
| FOXO1     | forkhead box O1                   | Q12778              | FKH1, FKHR, FOXO1    | Hs01054576_m1  | CD4, CD8             | Transcription factor                   | Transcription factor, apoptosis, autophagy, cell differentiation, gl                  |                                                                   |            |                               |
| FOXP3     | forkhead box P3                   | Q9BZS1              | AID, DIETER, IPEX    | Hs01085834_m1  | CD4                  | Transcription factor                   | Transcriptional regulator, B-cell homeostasis/Treg master regulat                     |                                                                   |            |                               |
| GATA3     | Gene Symbol:GATA3                 | P23771              | HDR                  | Hs00231122_m1  | CD4, CD8             | Transcription factor                   | Transcription factor, coagulation, Wnt signaling, cellular response                   |                                                                   |            |                               |
| GUSB      | glucuronidase beta                | P08236              | BG, MP57             | Hs09999908_m1  | CD4, CD8             | Housekeeping                           | Lysosomal enzyme                                                                      |                                                                   |            | Expressing gene               |
| HAVCR2    | hepatitis A virus cellular Q8TDQ0 | CD386, TIM-3        |                      | Hs00262170_m1  | CD4, CD8, Th1        | Inhibitory TCR corec                   | Activation of $\gamma$ m. tolerance, inhibition of a uTIM-3 is                        |                                                                   |            | Expressed on                  |
| HIST1H2BG | histone cluster 1, H2bg           | P82607              | H2BFA                | Hs00374317_s1  |                      | Activation                             | T cell activation 2362460                                                             | activated T1865317                                                |            |                               |
| ICOS      | inducible T-cell costimu          | Q9Y1W8              | CD278, AILM, CVID1   | Hs00359999_m1  | CD4, CD8, Th2        | Activating TCR corec                   | Activation and proliferation of T cells                                               |                                                                   |            | Generation and maint          |
| IFNG      | interferon gamma                  | P01579              | IFN $\gamma$         | Hs00898291_m1  | CD4, CCDC, NI        | Cytokine/chemokine r                   | Pro-inflammatory cytokine                                                             |                                                                   |            |                               |
| IGF2BP3   | insulin like growth fact          | Q00425              | CT98, IMP3, KOC, K   | Hs00559907_g1  |                      | Translational regulati                 | IGF2BP3 large 2.7E+07                                                                 |                                                                   |            | Enorm e 4811152               |
| IKZF1     | IKAROS family zinc fn             | Q13422              | IKAROS, LYF1         | Hs00958474_m1  | CD4, CD8             | Transcription factor                   | Transcription factor, lymphocyte developm                                             |                                                                   |            | Chromatin remodeling          |
| IKZF3     | IKAROS family zinc fn             | Q9UKT9              | AIOLOS               | Hs00232635_m1  | CD4, CD8             | Transcription factor                   | Transcription factor, lymphocyte development                                          |                                                                   |            |                               |
| IKZF4     | IKAROS family zinc fn             | Q9H259              | EOS                  | Hs00223842_m1  | CD4                  | Transcription factor                   | Transcription factor, lymphocyte developm                                             |                                                                   |            | Critical mediator of FC       |
| IL10      | interleukin 10                    | P22301              | TGIF, IL10A, CSIF    | Hs00961622_m1  | CD4 mono             | Signaling                              | Down-regulates expression of Th1 cytokine/Treg                                        |                                                                   |            |                               |
| IL17A     | interleukin 17A                   | Q16552              | IL-17, CTLA-8        | Hs00174383_m1  | CD4, CD8             | Signaling                              | Pro-inflammatory cytokine, Th17                                                       |                                                                   |            |                               |
| IL18RAP   | interleukin 18 receptor           | Q95236              | ACPL, CD218B, IL-18  | Hs003977695_m1 | CD4                  | Signaling                              | Pro-inflammatory cytokine, cell-mediated immunity                                     |                                                                   |            |                               |
| IL22      | interleukin 22                    | Q9GZ28              | TIFA                 | Hs01574154_m1  | CD4, CCDC            | Signaling                              | Pro-inflammatory cytokine, initiation of innate immune responses                      |                                                                   |            |                               |
| IL23A     | interleukin 23 subunit a          | Q9NQF7              | IL23, P19, SGRF      | Hs00372324_m1  | CD4                  | Signaling                              | IL-23 is an imp 1.7E+07                                                               |                                                                   |            | IL-23 is 3701078              |
| IL6ST     | interleukin 6 signal tran         | P40189              | CD130, GP130, IL6R   | Hs00174360_m1  |                      | Signaling                              | B cell lymphom.20951741; 20042455; 203840                                             |                                                                   |            |                               |
| IL7R      | interleukin 7 receptor            | P16871              | CD127, IL7RA         | Hs00902334_m1  | CD4, CEB             | Signaling                              | Receptor of IL-7                                                                      |                                                                   |            |                               |
| IPO8      | importin 8                        | Q15397              | RANBP8               | Hs00183533_m1  | CD4, CD8             | Housekeeping                           | Nuclear import                                                                        |                                                                   |            | Housekeeping gene             |
| IQGAP1    | IQ motif containing               | GTP146940           | HUMORFA01, SAR1      | Hs00896595_m1  |                      | Inhibitory TCR corec                   | IQGAP1 regula 22573807                                                                | IQGAP1: 14480615                                                  |            |                               |
| IRF1      | interferon regulatory fa          | P10914              | MAR                  | Hs00971960_m1  | CD8                  | Transcription factor                   | Activator of IFN- $\alpha$ and IFN- $\beta$ production                                |                                                                   |            |                               |
| IRF4      | interferon regulatory fa          | Q15306              | MUM1, LSIRF, NF-EL   | Hs01056533_m1  | CD8                  | Transcription factor                   | Activator of IFN production                                                           |                                                                   |            | Th9 master regulator?         |
| JAK1      | Janus kinase 1                    | P23458              | JTK3                 | Hs01026883_m1  | CD4                  | Signaling                              | Signaling molecule for IFN                                                            |                                                                   |            |                               |
| JAM3      | junctional adhesion mol           | Q9BX67              | JAM-2, JAM-3, JAM-   | Hs00230289_m1  |                      | Adhesion                               | T lymphocyte, NK cell, and dendritic cell trafficki                                   |                                                                   |            |                               |
| JUN       | Jun proto-oncogene                | AP05412             | AP-1, C-JUN          | Hs01103682_s1  | CD4                  | Transcription factor                   | Regulates gene expression                                                             |                                                                   |            |                               |
| KLFA      | Kruppel like factor 4             | Q43474              | EZF, GKL F           | Hs00358936_m1  | CD8                  | Transcription factor                   | Transcription factor, controls G1-to-S transition when DNA dam                        |                                                                   |            |                               |
| LAG3      | lymphocyte activating 3           | P18627              | CD223                | Hs00158563_m1  | CD4, CCNK            | Inhibitory TCR corec                   | Activation of immune responses                                                        |                                                                   |            | LAG-3 expression def          |
| LEF1      | lymphoid enhancer-binc            | Q9JUJ2              | TCF1A                | Rh01553173_m1  | CD8                  | Transcription factor                   | Transcription factor, enhancer of TCR activity, involved in Wnt pa                    |                                                                   |            |                               |
| MKI67     | marker of proliferation           | P46013              | KI-67, KIA, MIB-1, P | Hs01032443_m1  | CD4                  | Proliferation / Chroma                 | Nuclear protein, proliferation                                                        |                                                                   |            | KI-67                         |
| MMP9      | matrix metalloprotein             | P14780              | CLG4B, GELB, MAN     | Hs00957562_m1  |                      | Activation                             | MMP9, may fur 2063945                                                                 | Knockdown A3095987; ;                                             |            |                               |
| MPHOSPH8  | M-phase phosphoprote              | Q99549              | HSMPP8, TWA3, MP     | Hs00736888_m1  |                      | Transcription factor                   | MPP8 targets 1 2063945                                                                | Regulate 5482300                                                  |            |                               |
| NCAPD2    | non-SMC condensin I c             | Q15021              | CAP-D2, CNAPI, Cap   | Hs00274505_m1  |                      | Chromosome condensation                | A mutation in a Kleinsin-be                                                           | Condensin Associated                                              |            |                               |
| NF13      | nuclear factor, interleu          | Q18649              | E4BP4, IL3BP1, NFIL  | Hs00705412_s1  | CD8                  | Transcription factor                   | Transcription factor, represses PER1 and 2                                            |                                                                   |            |                               |
| NOC2L     | NOC2 like nuclear as              | Q9Y379              | NET15, NET7, NIR, P  | Hs004194444_g1 | CD8                  | Transcription factor                   | HDAC-independent inhibitor of HAT                                                     |                                                                   |            |                               |
| NTSE2     | S-nucleotidase acti               | P21569              | CALJA, CD73          | Hs00159696_m1  | CD4, CD8             | Inhibitory TCR corec                   | Conversion of extracellular nucleotides to membrane-permeabl                          |                                                                   |            |                               |
| PDCD1     | programmed cell death             | Q15116              | PD-1                 | Rh03418231_m1  | CD8                  | Inhibitory TCR corec                   | T-cell function, inhibitory signal                                                    |                                                                   |            |                               |
| PDK4      | pyruvate dehydrogenat             | Q18654              | none                 | Hs01037712_m1  |                      | Metabolism                             | the negative re 1.8E+07                                                               |                                                                   |            |                               |
| PF4V1     | platelet factor 4 variant         | P10720              | CXCL4L1, PF4A, SCY   | Hs01189127_s1  |                      | Cytokine/chemokine                     | CXCL4L1 Inhibi 17575164                                                               | Platelet fa                                                       | 3904624; ; |                               |
| PGK       | phosphoglycerate kin              | Q00558              | MIG10, PGKA          | Hs09999906_m1  | CD4, CD8             | Housekeeping                           | Cofactor for polymerase $\alpha$ , angiogenesis                                       |                                                                   |            | Housekeeping gene             |
| PIM2      | Pim-2 proto-oncogene              | Q9P1W9              | none                 | Hs00179139_m1  |                      | Proliferation                          | Pim-2 Kinase 1r 25987564                                                              | In Socs3-Stat1, 3.85 n                                            |            |                               |
| POLR2A    | RNA polymerase II sub             | P24928              | POLR2, POLRA, RPB    | Hs00172187_m1  | CD4, CCAll           | Housekeeping                           | Largest subunit of polymerase II, synthesis                                           |                                                                   |            | Housekeeping gene             |
| PRDM1     | PR domain 1                       | Q75626              | BLIMP1               | Hs00153557_m1  | CD8                  | Transcription factor                   | Repressor of IFN- $\beta$                                                             |                                                                   |            | Th2 cells by repres           |
| RORA      | RAR related orphan re             | P35398              | NR1F1, ROR1, ROR2    | Hs00536545_m1  | CD4, CD8             | Transcription factor                   | Nuclear hormone receptor, transcription factor, enhancer of gene                      |                                                                   |            |                               |
| RORC      | RAR related orphan re             | P51449              | IRM42, NR1F3, ROR    | Hs01076122_m1  | CD4                  | Transcription factor                   | Transcription factor, key molecule in differ                                          |                                                                   |            | Th17 master regulat           |
| RPL13A    | ribosomal protein L13a            | P40459              | L13A, TSTA1          | Hs00419496_g1  |                      | Housekeeping                           |                                                                                       |                                                                   |            | Housekeeping gene             |
| RUNX1     | runt related transcript           | Q01116              | AML1, CBFA2, EVI-1,  | Hs01021971_m1  | CD4, CD8             | Transcription factor                   | Transcription factor, insures normal hemat                                            |                                                                   |            | Th1 regulator, inhibi         |
| RUNX3     | runt related transcript           | Q13761              | AML2, CBFA3, PEBP    | Hs00231709_m1  | CD4                  | Transcription factor                   | Transcription factor, tumor suppressor                                                |                                                                   |            |                               |
| SELP      | selectin P                        | P16109              | CD62, CD62P, GMPI    | Hs00927900_m1  |                      | Adhesion                               | essential role in the initial recruitment of leukocy                                  |                                                                   |            |                               |
| SLAMF1    | signaling lymphocytic a           | Q13291              | IPO-3, CD150, SLAM   | Hs00234149_m1  | CD4, CEB, DC         | Activating                             | Stimulation and activation of cells                                                   |                                                                   |            | expressed on $\gamma$ 8 T cel |
| SLK       | STE20 like kinase                 | Q9HG2G              | LOSK, STK2           | Hs00207000_m1  |                      | Signaling                              | Germinal cente 27465533                                                               | Germinal c                                                        | 4002213; ; |                               |
| SMAD3     | SMAD family member                | P84022              | MADH3, HSPC193, J    | Hs00089210_m1  |                      | Transcription factor                   | Signal transducer, transcriptional modulac                                            | Smad3 binding to the                                              |            | mutations in du 27936095      |
| SNRK      | SNF related kinase                | Q9NRH2              | HSNFRK               | Hs00298395_m1  |                      | Metabolism                             |                                                                                       |                                                                   |            | Snrk-1 ove 3475258            |
| SPI1      | Spi-1 proto-oncogene              | P17947              | OF, PU.1, SFPI1, S   | Hs002786711_m1 | CD4                  | Transcription factor                   | Transcription factor, myeloid and B-lymph                                             | Th9 master regulator?                                             |            |                               |
| SPRY2     | sprouty RTK signaling             | Q43597              | IGAN3                | Hs01921749_s1  | CD4                  | Inhibitory                             | Inhibition of RTK signaling                                                           |                                                                   |            |                               |
| SPTBN1    | spectrin beta, non-eryt           | Q01062              | ELF, HEL102, SPTB    | Hs00162271_m1  |                      | Transcription factor                   | Called Spectrin 2509806                                                               | spectrin-r 2857017                                                |            |                               |
| STAT3     | signal transducer and             | P40763              | ADMO1, ADMO1, A      | Hs00374280_m1  | CD4                  | Transcription factor                   | Transcription activator following stimulation by IFN- $\gamma$ , IFN- $\gamma$ , IL-5 |                                                                   |            |                               |
| STAT4     | signal transducer and             | Q14765              | SLEB11               | Hs01028017_m1  | CD4                  | Transcription factor                   | Transcription activator essential to IL-12 r                                          | Th1 regulator induced                                             |            |                               |
| STAT6     | signal transducer and             | aP42226             | D12S1844, IL-4-STAT  | Hs00598625_m1  | CD4                  | Transcription factor                   | Transcription activator essential to IL-4 re                                          | Th2 regulator                                                     |            |                               |
| TBP       | TATA-box binding prot             | P20226              | TFIID, GTF2D, GTF2   | Hs09999910_m1  | CD4, CD8             | Housekeeping                           | Coordination of initiation of transcription                                           |                                                                   |            | by Housekeeping gene          |
| TCF7      | transcription factor 7            | T1P36402            | TCF-1                | Hs00175273_m1  | CD8                  | Transcription factor                   | Transcriptional activator, differentiation                                            |                                                                   |            |                               |
| TGFBF2    | transforming growth fa            | P37173              | AAT3, FAA3, LDS1B,   | Hs00234253_m1  |                      | Signaling                              | Guardian of T (24098055;                                                              |                                                                   |            |                               |
| TIGIT     | T-cell immunoreceptor             | Q495A1              | VSI9, VSTM3, WUC     | Hs00545087_m1  | CD4, CD8, Th         | Inhibitory TCR corec                   | Regulates T-cell dependent B-cell responses                                           |                                                                   |            |                               |
| TIMP1     | TIMP metalloprotein               | P01033              | CLGI, EPA, EPO, H    | Hs01092512_g1  |                      | Protein regulation                     | Regulates MMF-1850203                                                                 | TIMP1 an                                                          | 5305237; ; |                               |
| TMEFF1    | transmembrane protein             | Q81YR6              | H7365, TR-1          | Hs00186495_m1  |                      | Migration                              | crucial inhibitor of the Noc                                                          | TMEFF1 )                                                          | 1280611; ; |                               |
| TNF       | tumor necrosis factor             | P01375              | DIF, TNF-alpha, TNF  | Hs01113624_g1  | CD4 mp               | Transcription factor                   | Pro-inflammatory cytokine, proliferation, differentiation and apopt                   |                                                                   |            |                               |
| TNFRSF4   | TNF receptor superfam             | P43489              | CX40, CD134, ACT35   | Hs008937194_g1 |                      | Transcription factor r                 | TNF-receptor, T-cell activation and apoptosis, induces express                        |                                                                   |            |                               |
| TNFRSF9   | TNF receptor superfam             | Q07011              | 4-1BB, CD137, ILA    | Hs00155512_m1  | CD4, CEB, mor        | Transcription factor r                 | Clonal expansion, survival, and development of T cells                                |                                                                   |            |                               |
| TOX       | thymocyte selection a             | Q94900              | TOX1                 | Hs01055573_m1  | CD8                  | Transcription factor                   | Involved in chromatin assembly, transcription and replication, T-c                    |                                                                   |            |                               |
| TRAF5     | TNF receptor associat             | O00483              | MGC:39780, RNFB4     | Hs00182979_m1  | CD4                  | Cytokine/chemokine                     | Transducer of TNF signal                                                              |                                                                   |            |                               |
| ZEB2      | zinc finger E-box bind            | Q60315              | SIP-1, SMAD1P1       | Hs00207691_m1  | CD4                  | Transcription factor                   | Transcriptional repressor activated by SMADs                                          |                                                                   |            |                               |

**Supplemental Table S4. Selected Pan-cancer and T cell polarizing DEGs for validation.** DEGs selected for validation on new RCC cohort ptPBL CD8<sup>+</sup> T cells. Assay IDs represent TaqMan assays codes used. Pan-cancer DEGs are in bold. PMID (Pubmed ID) and PMCID (Pubmed central ID) and notes are reference for pan-cancer functions and link to immunity.

**Table S5**

**Table S5: Comparison of DEGs validation assays to HIV-1 elite controllers.**

|                                                        |                      | RCC ptPBL / cdPBL |           |         | HIV-1 Elite | PMID      |          |          |
|--------------------------------------------------------|----------------------|-------------------|-----------|---------|-------------|-----------|----------|----------|
|                                                        |                      | DEG               | Avg.LogFC | P value | t ratio     | Avg.LogFC | Cancer   | HIV-1    |
| DEG impact on HIV-1 replication and cancer progression | non-permissive       | TIMP1             | 7.897     | 0.0868  | 1.744       | 0.004     | 26258010 | 25136083 |
|                                                        |                      | FOXO1             | 4.217     | <0.0001 | 5.495       | 0.302     | 18391973 | 25330112 |
|                                                        |                      | CD69              | 1.434     | 0.0928  | 1.757       | 0.176     | 23954168 | 28053103 |
|                                                        |                      | IL7R              | 1.305     | 0.0001  | 4.723       | 0.598     | 28314253 | 22693657 |
|                                                        |                      | IL23A             | 1.259     | 0.0116  | 2.611       | 0.109     | 25008775 | 29091911 |
|                                                        |                      | IRF1              | 1.154     | 0.0423  | 2.079       | 0.119     | 23807161 | 17502719 |
|                                                        |                      | RUNX3             | 1.135     | 0.0043  | 2.952       | 0.100     | 25008775 | 24651404 |
|                                                        |                      | IKZF1             | 1.080     | 0.0115  | 2.757       | 0.189     | 28471446 | 21933919 |
|                                                        |                      | STAT4             | 1.070     | 0.0003  | 3.778       | 0.191     | 21998209 | 29212666 |
|                                                        | permissive           | 4-1BB             | 0.846     | 0.0934  | 1.707       | -0.370    | 22232735 | 19406689 |
|                                                        |                      | SPI1              | 0.796     | 0.0614  | 1.910       | -0.056    | 28415748 | 24503097 |
|                                                        |                      | PIM2              | 0.782     | 0.0009  | 3.503       | -0.018    | 27901106 | 25207815 |
|                                                        |                      | STAT6             | 0.763     | 0.0253  | 2.299       | -0.126    | 21595984 | 11371617 |
|                                                        |                      | LAG3              | 0.735     | 0.0078  | 2.760       | -0.637    | 28258692 | 25738606 |
|                                                        |                      | CDA               | 0.711     | 0.0120  | 2.630       | -0.035    | 27601591 | 15713780 |
|                                                        |                      | FASLG             | 0.482     | <0.0001 | 6.305       | -0.240    | 12949796 | 11754810 |
|                                                        |                      | CD27              | 0.459     | 0.0005  | 3.705       | -0.240    | 15345595 | 22278254 |
|                                                        |                      | TOX               | 0.389     | <0.0001 | 4.679       | -0.266    | 26885442 | 26885442 |
|                                                        |                      | CD160             | 0.350     | 0.0001  | 4.297       | -0.458    | 25711213 | 22916009 |
|                                                        |                      | CD244             | 0.340     | <0.0001 | 4.798       | -0.251    | 15634901 | 28396665 |
|                                                        |                      | ZEB2              | 0.303     | <0.0001 | 4.762       | -0.165    | 26503445 | 26503446 |
|                                                        |                      | CCR5              | 0.204     | 0.0043  | 2.981       | -0.568    | 22720226 | 9050881  |
|                                                        |                      | MMP9              | 1.7164    | <0.0001 | 4.4987      | -0.0088   | 26979530 | 28902848 |
|                                                        |                      | IQGAP1            | 1.2742    | 0.0002  | 3.9852      | -0.2185   | 26252773 | 17950003 |
|                                                        | inversely permissive | EOMES             | 4.0533    | <0.0001 | 4.7282      | -0.2156   | 20713880 | 25032686 |
|                                                        |                      | BATF              | 3.4560    | 0.0007  | 3.5700      | -0.3773   | 26376615 | 25790189 |
|                                                        |                      | KLF4              | 1.3755    | 0.0380  | 2.2077      | -0.0364   | 26977883 | 26372274 |
|                                                        |                      | ICOS              | 1.2651    | 0.0074  | 2.7812      | -0.2228   | 24687957 | 20116985 |
|                                                        |                      | CXCR3             | 1.2182    | 0.0268  | 2.2624      | -0.2124   | 26434630 | 24035365 |
|                                                        |                      | ETS1              | 0.9078    | 0.0002  | 4.0153      | 0.2169    | 23288305 | 21148801 |
|                                                        |                      | TGFBR2            | 0.8263    | 0.0001  | 4.1642      | 0.3311    | 12154374 | 23217625 |
|                                                        |                      | IL18RAP           | 0.7503    | 0.0122  | 2.5922      | 0.4205    | 27148488 | 27049306 |
|                                                        |                      | BCL11B            | 0.7488    | 0.0019  | 3.3185      | 0.3056    | 21878675 | 20660613 |
|                                                        |                      | TNF               | 0.6742    | 0.0055  | 2.8897      | 0.3435    | 18954521 | 20400885 |
|                                                        |                      | NFIL3             | 0.6712    | 0.0727  | 1.8224      | 0.2080    | 26539561 | 25768938 |
|                                                        |                      | SNRK              | 0.5830    | 0.0010  | 3.4779      | 0.1106    | 22874833 | 24498147 |
| LEF1                                                   | 0.5553               | <0.0001           | 5.1683    | 0.3496  | 20688898    | 24664171  |          |          |
| IFNG                                                   | 0.5292               | <0.0001           | 4.5764    | 0.2017  | 19451644    | 24454311  |          |          |
| JUN                                                    | 0.3042               | 0.0161            | 2.4826    | 0.0804  | 17442952    | 10488148  |          |          |
| CD28                                                   | 0.2785               | 0.0016            | 3.3208    | 0.3417  | 25550693    | 26945343  |          |          |

**Supplemental Table S5. Comparison of validation assays to HIV-1 elite controllers.**

Pan-cancer DEGs were compared to DEGs identified from HIV-1 elite controllers ( $n = 81$  patients and 98 controls). Many Pan-cancer DEGs are commonly modulated in expression, or have similar effects towards inducing T cell HIV-1 or cancer permissiveness. Pathways most associated with non-permissive genes included positive regulation of T cell gene translation, differentiation, activation, and proliferation, and response to cytokines. Pathways associated with permissive genes were regulation of cell surface receptor signaling, cytokine-receptor interactions, hepatitis B, and proteoglycans in cancer. Inversely permissive genes were also enriched in immune differentiation, but were also associated with auto-immune disease pathways. PMID, Pubmed ID; Avg.LogFC, average log fold-change; t-ratio, ratio divided by the standard error (GraphPad).

**Table S6**

| Table S6: Immunotherapy resistance genes common to pan-cancer DEGs. |                                                                                                                      |                                                                                                                                                                                                                    |                                                                                             |
|---------------------------------------------------------------------|----------------------------------------------------------------------------------------------------------------------|--------------------------------------------------------------------------------------------------------------------------------------------------------------------------------------------------------------------|---------------------------------------------------------------------------------------------|
|                                                                     | pan-cancer                                                                                                           |                                                                                                                                                                                                                    | GENEX BIOMARK                                                                               |
|                                                                     | ptPBMC / cdPBMC                                                                                                      | TIL/TIC                                                                                                                                                                                                            |                                                                                             |
| Hugo et al.                                                         | CXCL5<br><b>MMP9</b><br>ESAM<br>FPR2<br>PLCB4<br>ZMYND12                                                             | CRYAB<br>FXD3<br>ITGA3<br>KBTBD4<br>NRP1<br>RASGRP1<br>SERPINE1<br>SMPD2<br>TCF4<br>TRPV4                                                                                                                          | IL10<br><b>MMP9</b><br>NFIL3                                                                |
| Rizvi et al.                                                        | APP<br><b>BRAF</b><br>F13A1<br>ITGB7<br><b>LEF1</b><br>LEPR<br>SIGLEC6<br>SLC40A1<br>SORL1<br>TACK1<br>TNIK<br>OPHN1 | AGAP2<br><b>BRAF</b><br>COL1A1<br>DIAPH1<br>EED<br>EIF5<br>FRAS1<br>GNAI3<br>ITGA9<br>ITGB6<br>ITPKB<br>LIMK1<br>MED13<br>NCAPD3<br>NRP1<br>RASGRP1<br>SPARCL1<br>TCF4<br>THOC2<br>TLR2<br>TP53<br>SEMA3C<br>NLRC5 | CD244<br>FASLG<br>IKZF1<br>IL18RAP<br><b>LEF1</b><br>MKI67<br>STAT4<br>TOX<br>GATA3<br>JAK1 |

**Supplemental Table S6. Immunotherapy resistance genes common to pan-cancer DEGs.** Published transcriptomic and genetic profiles of melanoma and NSCLC patients treated by anti-PD-1 therapy were compared to pan-cancer DEGs (Hugo and Rizvi refs found in main text). Pan-cancer columns are DEGs discovered from ccRCC training set and confirmed across five cancers. Genex BIOMARK column represents DEGs we validated on our validation cohort.



**Table S7**

**Table S7: Pan-cancer and T cell DEG validation summary.**

**a) CD8 ptPBL upregulated DEGs validated by qRT-PCR**

| DEG                      | microarray | Biomark HD |
|--------------------------|------------|------------|
|                          | P value    | P value    |
| RUNX1                    | <0.0001    | 0.0233     |
| BATF $\phi$ §            | <0.0001    | 0.0007     |
| EOMES $\phi$             | <0.0001    | <0.0001    |
| IKZF1 $\infty$ † $\phi$  | <0.0001    | 0.0115     |
| RUNX3 $\phi$             | <0.0001    | 0.0043     |
| ETS1 $\infty$ $\phi$     | 0.0001     | 0.0047     |
| TIGIT *                  | 0.0001     | 0.0109     |
| ICOS $\infty$            | 0.0002     | 0.0074     |
| ZEB2 $\phi$ §            | 0.0006     | 0.0417     |
| IFNG $\infty$ §          | 0.0007     | 0.0698     |
| MMP9 $\infty$ ‡ $\phi$ § | 0.0013     | <0.0001    |
| IRF1 $\phi$ §            | 0.0014     | 0.0423     |
| PRDM1                    | 0.0018     | 0.0004     |
| CDA $\infty$ §           | 0.0021     | 0.0540     |
| KLF4 $\phi$              | 0.0025     | 0.0380     |
| MKI67 † $\infty$         | 0.0032     | 0.0014     |
| BCL6 $\infty$ §          | 0.0057     | 0.0428     |
| SELP §                   | 0.0073     | 0.0737     |
| STAT3 $\infty$ §         | 0.0214     | 0.0002     |
| TIMP1 $\infty$ §         | 0.0244     | 0.0688     |
| IL6ST $\infty$           | 0.0416     | 0.0072     |

**b) CD8 ptPBL downregulated DEGs validated by qRT-PCR**

| DEG                      | microarray | Biomark HD |
|--------------------------|------------|------------|
|                          | P value    | P value    |
| SNRK $\infty$            | <0.0001    | 0.0010     |
| TGFBR2 $\infty$ §        | <0.0001    | 0.0001     |
| DGKA $\infty$ §          | 0.0003     | 0.0022     |
| TCF7 $\infty$ §          | 0.0005     | <0.0001    |
| RORA $\infty$ §          | 0.0006     | 0.0052     |
| CD6 §                    | 0.0009     | 0.0770     |
| LEF1 $\infty$ † $\phi$ § | 0.0024     | <0.0001    |
| BCL11B $\infty$ §        | 0.0024     | 0.0026     |
| SMAD3 $\infty$ §         | 0.0027     | 0.0374     |
| MPHOSPH8 $\infty$ §      | 0.0051     | 0.0700     |
| SLK $\infty$             | 0.0051     | 0.0502     |
| JUN $\infty$ §           | 0.0081     | 0.0161     |
| SPTBN1 $\infty$          | 0.0106     | 0.0008     |
| IL7R $\infty$ §          | 0.0250     | 0.0291     |
| NT5E $\infty$ §          | 0.0329     | 0.0272     |
| CD69 $\infty$ §          | 0.0398     | 0.0222     |
| PIM2 $\infty$ §          | 0.0410     | 0.0009     |
| CD27 $\infty$ §          | 0.0411     | 0.0005     |
| IL23A $\infty$ §         | 0.0423     | 0.0327     |
| IQGAP1 *                 | 0.0455     | 0.0320     |

**c) PBMC upregulated DEGs validated by qRT-PCR**

| DEG              | microarray | Biomark HD |
|------------------|------------|------------|
|                  | P value    | P value    |
| STAT3 $\infty$ § | 0.0214     | 0.0011     |

**d) PBMC downregulated DEGs validated by qRT-PCR**

| DEG               | microarray | Biomark HD |
|-------------------|------------|------------|
|                   | P value    | P value    |
| SNRK $\infty$     | <0.0001    | 0.0226     |
| BCL11B $\infty$ § | 0.0024     | 0.0796     |
| JUN $\infty$      | 0.0081     | 0.0090     |
| IQGAP1 $\infty$   | 0.0455     | 0.0427     |

**e) Other PBMC upregulated DEGs by qRT-PCR**

| DEG    | Biomark HD       |         |
|--------|------------------|---------|
|        | RCC / cd t ratio | P value |
| BTLA   | 2.9077           | 0.0060  |
| DGKE * | 1.7710           | 0.0846  |
| IL17A  | 3.8160           | 0.0005  |
| IL22   | 3.8160           | 0.0005  |
| PDK4 * | 2.0679           | 0.0455  |

**f) Other PBMC downregulated DEGs by qRT-PCR**

| DEG              | Biomark HD       |         |
|------------------|------------------|---------|
|                  | RCC / cd t ratio | P value |
| CTLA-4           | 1.8752           | 0.0685  |
| FOXO1 $\infty$ § | 2.6247           | 0.0124  |
| FOXP3 $\infty$   | 1.7421           | 0.0896  |
| LAG3 *           | 1.7141           | 0.0947  |
| NFIL3 $\infty$ § | 2.0489           | 0.0474  |
| NOC2L            | 2.5649           | 0.0144  |
| PDCD1 $\infty$   | 2.0897           | 0.0434  |
| SPI1 $\infty$ §  | 2.0089           | 0.0517  |
| STAT4 $\phi$ §   | 1.8043           | 0.0791  |
| STAT6 $\infty$ § | 4.9879           | <0.0001 |

\* validated pan-cancer DEGs identified by this study

$\infty$  top Biomark HD correlating genes

$\phi$  common to both HIV-1 and cancer resistance

§ common to bacterial infection by Song et al.

‡ common to immunotherapy resistance Hugo et al.

† common to immunotherapy resistance by Rizvi et al.

cd, control donor

pt, patient

**Supplemental Table S7. Pan-cancer and T cell DEG validation summary.** Table summarizing significant DEGs validated from microarrays using microfluidics qRT-PCR and new RCC cohort. Table also highlights DEGs most significantly correlating, and those common to studies HIV-1 resistance, bacterial resistance, and resistance to immunotherapy. Red are increased in expression, green are decreased in expression. (a-f) all DEGs validated from microarrays to qRT-PCR. (a) DEGs validated as upregulated in CD8+ T cells isolated from ptPBMC relative to those isolated from cdPBMC. (b) DEGs validated as downregulated in CD8+ T cells isolated from ptPBMC relative to those isolated from cdPBMC. (c) DEGs validated as upregulated in total ptPBMC relative to those isolated from cdPBMC. (d) DEGs validated as downregulated in total ptPBMC relative to those isolated from cdPBMC. (e) Other PBL DEGs observed as being

Supplemental Figures and Tables: Running title: Pan-Pathology targets of the failed immune response

significantly upregulated by qRT-PCR. (f) Other PBL DEGs observed as being significantly upregulated by qRT-PCR. Symbols: \*, validated pan-cancer DEGs identified by this study; ∞, top Biomark HD correlating genes; φ, common to both HIV-1 and cancer resistance; §, common to bacterial infection by Song et al.; ‡, common to immunotherapy resistance Hugo et al.; †, common to immunotherapy resistance by Rizvi et al.

**Table S8**

**Table S8: Spliceforms of pan-cancer DEGs.**

| Isolate       | Gene     | Tot. No | Transcript Cluster ID | Group  | PSR/Junction ID  | Splicing Event            | ANOVA   | Splice Index | Splice Score |
|---------------|----------|---------|-----------------------|--------|------------------|---------------------------|---------|--------------|--------------|
| ptPBMC/TIIC   | CD69     | 2       | TC12001207.hg.1       | Coding | PSR12015916.hg.1 | Intron Retention          | 0.04458 | -3.37        | 0.5          |
| TIL/TIIC      | CD69     | 2       | TC12001207.hg.1       | Coding | PSR12015916.hg.1 | Intron Retention          | 0.04458 | -3.37        | 0.5          |
| ptPBMC/cdPBMC | CD69     | 1       | TC12001207.hg.1       | Coding | PSR12015916.hg.2 | Intron Retention          | 0.0254  | -4.24        | 0.69         |
| ptPBMC/TIIC   | IQGAP1   | 11      | TC15000864.hg.1       | Coding | PSR15008089.hg.1 | Cassette Exon             | 0.04307 | -4.52        | 0.22         |
| TIL/TIIC      | IQGAP1   | 3       | TC15000864.hg.1       | Coding | PSR15008089.hg.1 | Cassette Exon             | 0.03493 | -2.59        | 0.1          |
| TIL/TIIC      | IQGAP1   | 3       | TC15000864.hg.1       | Coding | PSR15008097.hg.1 | Cassette Exon             | 0.00712 | -2.56        | 0.11         |
| ptPBMC/TIIC   | IQGAP1   | 11      | TC15000864.hg.1       | Coding | PSR15008097.hg.1 | Cassette Exon             | 0.00946 | -2.29        | 0.02         |
| ptPBMC/cdPBMC | IQGAP1   | 2       | TC15000864.hg.1       | Coding | PSR15008097.hg.2 | Cassette Exon             | 0.03111 | 2.07         | 0.15         |
| ptPBMC/TIIC   | LAG3     | 4       | TC12000091.hg.1       | Coding | PSR12001036.hg.1 | Intron Retention          | 0.00911 | -4.14        | 0.75         |
| TIL/TIIC      | LAG3     | 5       | TC12000091.hg.1       | Coding | PSR12001036.hg.1 | Intron Retention          | 0.01698 | -3.58        | 0.64         |
| ptPBMC/TIL    | MMP9     | 4       | TC20000363.hg.1       | Coding | PSR20005253.hg.1 | Cassette Exon             | 0.02365 | 6.88         | 0.32         |
| ptPBMC/TIIC   | MMP9     | 3       | TC20000363.hg.1       | Coding | PSR20005253.hg.1 | Cassette Exon             | 0.04717 | 3.32         | 0.22         |
| TIL/TIIC      | MMP9     | 2       | TC20000363.hg.1       | Coding | PSR20005253.hg.1 | Mutually Exclusive Exons* | 0.00995 | -2.07        | 0.22         |
| ptPBMC/TIIC   | MPHOSPH8 | 7       | TC13000017.hg.1       | Coding | PSR13000059.hg.1 | Cassette Exon             | 0.00082 | 2.21         | 0.25         |
| TIL/TIIC      | MPHOSPH8 | 5       | TC13000017.hg.1       | Coding | PSR13000059.hg.1 | Cassette Exon             | 0.01921 | 2.07         | 0.27         |
| ptPBMC/TIIC   | MPHOSPH8 | 7       | TC13000017.hg.1       | Coding | PSR13000063.hg.1 | Cassette Exon             | 0.02955 | 2.81         | 0.16         |
| TIL/TIIC      | MPHOSPH8 | 5       | TC13000017.hg.1       | Coding | PSR13000063.hg.1 | Cassette Exon             | 0.00483 | 2.69         | 0.15         |
| ptPBMC/TIL    | TCF7     | 3       | TC05000657.hg.1       | Coding | PSR05009040.hg.1 | Cassette Exon             | 0.01458 | -9.09        | 0.28         |
| ptPBMC/TIIC   | TCF7     | 44      | TC05000657.hg.1       | Coding | PSR05009040.hg.1 | Cassette Exon             | 0.01231 | -19.14       | 0.28         |
| TIL/TIIC      | TCF7     | 3       | TC05000657.hg.1       | Coding | PSR05009040.hg.1 | Cassette Exon             | 0.00963 | -2.11        | 0.1          |
| ptPBMC/TIIC   | TIGIT    | 5       | TC03000588.hg.1       | Coding | PSR03010797.hg.1 | Alternative 5' Donor Site | 0.04456 | -2.75        | 0.28         |
| TIL/TIIC      | TIGIT    | 10      | TC03000588.hg.1       | Coding | PSR03010797.hg.1 | Alternative 5' Donor Site | 0.02218 | -3.28        | 0.36         |
| ptPBMC/TIIC   | TIGIT    | 5       | TC03000588.hg.1       | Coding | PSR03010790.hg.1 | Cassette Exon             | 0.03836 | -7.71        | 0.14         |
| TIL/TIIC      | TIGIT    | 10      | TC03000588.hg.1       | Coding | PSR03010790.hg.1 | Cassette Exon             | 0.04747 | -7.88        | 0.07         |
| ptPBMC/TIIC   | TIMP1    | 3       | TC0X000238.hg.1       | Coding | PSR0X002817.hg.1 | Intron Retention          | 0.00831 | -3.55        | 0.64         |
| TIL/TIIC      | TIMP1    | 4       | TC0X000238.hg.1       | Coding | PSR0X002817.hg.1 | Intron Retention          | 0.0153  | -3.91        | 0.73         |

\* difference in splicing event estimate

**Supplemental Table S8. Spliceforms of pan-cancer DEGs.** TAC expression console was used with paired ccRCC isolates to define pan-cancer genes not only modified in overall gene expression, but also possibly affecting T cell fitness by being expressed as modified RNA isoforms. Only coding genes are represented in table. Tot. No. represents total number of significant isoforms present between isolates. PSR/Junction ID retained is matched significant isoform present across isolates. All other definitions can be found at: [https://assets.thermofisher.com/TFS-Assets/LSG/manuals/tac\\_user\\_manual.pdf](https://assets.thermofisher.com/TFS-Assets/LSG/manuals/tac_user_manual.pdf).

Supplemental Figures and Tables: Running title: Pan-Pathology targets of the failed immune response

Table S9

| ptPBL DEG | Spearman r | 95% CI            | P val (two-tailed) | ptPBL DEG | Spearman r | 95% CI            | P val (two-tailed) | ptPBL DEG | Spearman r | 95% CI            | P val (two-tailed) |
|-----------|------------|-------------------|--------------------|-----------|------------|-------------------|--------------------|-----------|------------|-------------------|--------------------|
| AAK1      | 0.1652     | 0.1173 to 0.2123  | <0.0001            | ITGB7     | 0.2952     | 0.2500 to 0.3392  | <0.0001            | TRO       | 0.1362     | 0.0879 to 0.1838  | <0.0001            |
| ABL1      | 0.0731     | 0.0173 to 0.1735  | <0.0001            | ITK       | 0.1883     | 0.1407 to 0.2350  | <0.0001            | TUBA4A    | 0.1988     | 0.1514 to 0.2453  | <0.0001            |
| ACAP1     | 0.0528     | 0.0168 to 0.1884  | <0.0001            | JAK3      | 0.28       | 0.2244 to 0.3241  | <0.0001            | TUBB8     | 0.2724     | 0.2285 to 0.3170  | <0.0001            |
| ACTG1     | 0.1783     | 0.1306 to 0.2252  | <0.0001            | KPNA4     | 0.2352     | 0.1885 to 0.2808  | <0.0001            | TUBB1     | 0.237      | 0.1904 to 0.2826  | <0.0001            |
| ACTL6A    | 0.1284     | 0.0808 to 0.1782  | <0.0001            | KTNA1     | 0.1186     | 0.0702 to 0.1665  | <0.0001            | TUBB3     | 0.2206     | 0.1736 to 0.2666  | <0.0001            |
| ACTN1     | 0.2775     | 0.2318 to 0.3220  | <0.0001            | LAX1      | 0.1223     | 0.0739 to 0.1702  | <0.0001            | UBASH3A   | 0.1697     | 0.1218 to 0.2187  | <0.0001            |
| ADGRE3    | 0.1213     | 0.0727 to 0.1691  | <0.0001            | LCN2      | 0.1495     | 0.1014 to 0.1970  | <0.0001            | USP9Y     | 0.1147     | 0.0624 to 0.1627  | <0.0001            |
| APP       | 0.226      | 0.1792 to 0.2719  | <0.0001            | LEF1      | 0.1593     | 0.1113 to 0.2066  | <0.0001            | VEGFC     | 0.3588     | 0.3155 to 0.4007  | <0.0001            |
| ARHGAP10  | 0.1125     | 0.0639 to 0.1604  | <0.0001            | LEFR      | 0.1092     | 0.0607 to 0.1573  | <0.0001            | VL1       | 0.1826     | 0.1350 to 0.2294  | <0.0001            |
| ARHGAP24  | 0.1861     | 0.1385 to 0.2341  | <0.0001            | LGA1      | 0.407      | 0.2949 to 0.5191  | <0.0001            | YWHB      | 0.0813     | 0.0483 to 0.1452  | <0.0001            |
| ARH2      | 0.1247     | 0.0762 to 0.1725  | <0.0001            | LIMS1     | 0.1339     | 0.0856 to 0.1816  | <0.0001            | WASF3     | 0.1144     | 0.0659 to 0.1623  | <0.0001            |
| ATM       | 0.1128     | 0.0642 to 0.1608  | <0.0001            | LTB       | 0.3474     | 0.3037 to 0.3897  | <0.0001            | YWHAE     | 0.1285     | 0.0801 to 0.1763  | <0.0001            |
| BACH2     | 0.1328     | 0.0845 to 0.1805  | <0.0001            | LTBP1     | 0.2899     | 0.2406 to 0.3302  | <0.0001            | YWHAZ     | 0.1238     | 0.0743 to 0.1717  | <0.0001            |
| BCL2      | 0.1453     | 0.0970 to 0.1928  | <0.0001            | LVS       | 0.2788     | 0.2311 to 0.3232  | <0.0001            | PAAR1     | 0.0936     | 0.0440 to 0.1423  | <0.0001            |
| BCL2L1    | 0.1432     | 0.0950 to 0.1908  | <0.0001            | MAL       | 0.1895     | 0.1419 to 0.2362  | <0.0001            | CHD7      | 0.09161    | 0.04295 to 0.1398 | 0.0002             |
| BLK       | 0.113      | 0.0645 to 0.1610  | <0.0001            | MALT1     | 0.3924     | 0.3503 to 0.4330  | <0.0001            | CYSTM1    | 0.09119    | 0.04252 to 0.1394 | 0.0002             |
| BMP6      | 0.1983     | 0.1204 to 0.2154  | <0.0001            | MAP3K9    | 0.1571     | 0.1091 to 0.2044  | <0.0001            | SH3YL1    | 0.09095    | 0.04228 to 0.1392 | 0.0002             |
| BMP2      | 0.2238     | 0.1770 to 0.2696  | <0.0001            | MAP4K1    | 0.1872     | 0.1193 to 0.2143  | <0.0001            | ASAP2     | 0.09057    | 0.04390 to 0.1388 | 0.0002             |
| BP1       | 0.1522     | 0.1041 to 0.1996  | <0.0001            | MAPKAP1   | 0.1886     | 0.1411 to 0.2353  | <0.0001            | THRA      | 0.0904     | 0.04172 to 0.1386 | 0.0002             |
| BRAF      | 0.1162     | 0.0671 to 0.1641  | <0.0001            | MAX       | 0.1793     | 0.1316 to 0.2262  | <0.0001            | PDE4A     | 0.08989    | 0.04121 to 0.1381 | 0.0002             |
| BTX       | 0.1841     | 0.1365 to 0.2309  | <0.0001            | MCMT      | 0.1202     | 0.07173 to 0.1680 | <0.0001            | CXCR1     | 0.08889    | 0.04021 to 0.1372 | 0.0002             |
| CALD1     | 0.2234     | 0.1765 to 0.2693  | <0.0001            | MA3       | 0.1719     | 0.1241 to 0.2169  | <0.0001            | ATPE      | 0.08856    | 0.03987 to 0.1368 | 0.0002             |
| CAMK4     | 0.117      | 0.0683 to 0.1649  | <0.0001            | MMP12     | 0.3964     | 0.3544 to 0.4368  | <0.0001            | SIGLEC6   | 0.08848    | 0.03980 to 0.1367 | 0.0003             |
| CAMP      | 0.4261     | 0.3853 to 0.4653  | <0.0001            | MMRN1     | 0.301      | 0.2559 to 0.3448  | <0.0001            | GUL1      | 0.0884     | 0.03971 to 0.1367 | 0.0003             |
| CARD1     | 0.3802     | 0.3480 to 0.4309  | <0.0001            | MMP1      | 0.4337     | 0.3958 to 0.4913  | <0.0001            | VCL       | 0.08787    | 0.03918 to 0.1361 | 0.0003             |
| CARD19    | 0.3919     | 0.2569 to 0.3457  | <0.0001            | MSN       | 0.2970     | 0.2527 to 0.3417  | <0.0001            | PAD4      | 0.08719    | 0.03849 to 0.1355 | 0.0003             |
| CASP8A2   | 0.4821     | 0.4421 to 0.5289  | <0.0001            | MTRM1     | 0.158      | 0.1100 to 0.2053  | <0.0001            | OPHN1     | 0.0863     | 0.03760 to 0.1346 | 0.0004             |
| CBCL      | 0.1877     | 0.1292 to 0.2239  | <0.0001            | MTOR      | 0.152      | 0.1082 to 0.2035  | <0.0001            | ALOX12    | 0.08616    | 0.03746 to 0.1345 | 0.0004             |
| CCCL5     | 0.4893     | 0.4513 to 0.5267  | <0.0001            | MTRNR1    | 0.1745     | 0.1287 to 0.2215  | <0.0001            | DEF1A     | 0.08613    | 0.03743 to 0.1344 | 0.0004             |
| CCRD4     | 0.09564    | 0.04701 to 0.1438 | <0.0001            | MX1       | 0.1738     | 0.1290 to 0.2208  | <0.0001            | IGKV2D-40 | 0.08613    | 0.03743 to 0.1344 | 0.0004             |
| CD109     | 0.1074     | 0.05884 to 0.1554 | <0.0001            | MXD1      | 0.1364     | 0.08809 to 0.1840 | <0.0001            | MB21D1    | 0.08613    | 0.03743 to 0.1344 | 0.0004             |
| CD151     | 0.2818     | 0.2362 to 0.3262  | <0.0001            | MYL9      | 0.2515     | 0.2052 to 0.2967  | <0.0001            | FCRL1     | 0.08603    | 0.03733 to 0.1343 | 0.0004             |
| CD226     | 0.2069     | 0.1624 to 0.2559  | <0.0001            | MYLK      | 0.2052     | 0.1578 to 0.2516  | <0.0001            | ERAP1     | 0.08572    | 0.03702 to 0.1340 | 0.0004             |
| CD27      | 0.3379     | 0.2939 to 0.3805  | <0.0001            | NCOA3     | 0.1446     | 0.09639 to 0.1921 | <0.0001            | RNF217    | 0.08572    | 0.03702 to 0.1340 | 0.0004             |
| CD38      | 0.2256     | 0.1787 to 0.2715  | <0.0001            | NELL1     | 0.1845     | 0.1369 to 0.2313  | <0.0001            | GRAP2     | 0.08471    | 0.03600 to 0.1330 | 0.0005             |
| CD3D      | 0.1969     | 0.1495 to 0.2434  | <0.0001            | NCOR2     | 0.3085     | 0.2636 to 0.3520  | <0.0001            | LY86F     | 0.08465    | 0.03594 to 0.1330 | 0.0005             |
| CD3E      | 0.3246     | 0.2771 to 0.3647  | <0.0001            | NCOR2     | 0.1894     | 0.1418 to 0.1913  | <0.0001            | CXCR1     | 0.08452    | 0.03581 to 0.1328 | 0.0005             |
| CD3G      | 0.2001     | 0.1527 to 0.2465  | <0.0001            | NLK       | 0.1767     | 0.1290 to 0.2236  | <0.0001            | SOD2      | 0.08422    | 0.03551 to 0.1325 | 0.0005             |
| CD5       | 0.1223     | 0.07387 to 0.1701 | <0.0001            | NLRCA4    | 0.2827     | 0.2372 to 0.3271  | <0.0001            | RPAP3     | 0.08406    | 0.03535 to 0.1324 | 0.0005             |
| CD6       | 0.1182     | 0.06973 to 0.1691 | <0.0001            | NOG       | 0.1755     | 0.1278 to 0.2225  | <0.0001            | HCP5      | 0.08226    | 0.03354 to 0.1306 | 0.0007             |
| CD99      | 0.2169     | 0.1648 to 0.2713  | <0.0001            | NPTX1     | 0.1886     | 0.1408 to 0.1916  | <0.0001            | TOX3      | 0.08228    | 0.03354 to 0.1306 | 0.0007             |
| CD88      | 0.3277     | 0.2834 to 0.3706  | <0.0001            | NRG1      | 0.1024     | 0.0578 to 0.1505  | <0.0001            | DOCK11    | 0.0822     | 0.03348 to 0.1305 | 0.0007             |
| CD95      | 0.2595     | 0.2134 to 0.3045  | <0.0001            | NTSE      | 0.0907     | 0.04807 to 0.1449 | <0.0001            | ABCC4     | 0.08078    | 0.03205 to 0.1291 | 0.0008             |
| CDK13     | 0.16257    | 0.1146 to 0.2097  | <0.0001            | ODF2      | 0.1783     | 0.1306 to 0.2252  | <0.0001            | IGKV1-1   | 0.08078    | 0.03205 to 0.1291 | 0.0008             |
| CCACAM8   | 0.1251     | 0.0769 to 0.1729  | <0.0001            | P2RX1     | 0.1712     | 0.1241 to 0.1462  | <0.0001            | ERAP1     | 0.08078    | 0.03205 to 0.1291 | 0.0008             |
| CFI2      | 0.2125     | 0.1653 to 0.2586  | <0.0001            | PAG1      | 0.1221     | 0.07371 to 0.1700 | <0.0001            | MFS1D1    | 0.08078    | 0.03205 to 0.1291 | 0.0008             |
| CITA      | 0.1206     | 0.07219 to 0.1685 | <0.0001            | PANX1     | 0.2219     | 0.1749 to 0.2678  | <0.0001            | POLRG     | 0.08064    | 0.03190 to 0.1290 | 0.0008             |
| CLEC1B    | 0.189      | 0.1414 to 0.2357  | <0.0001            | PDCD4     | 0.2204     | 0.1734 to 0.2663  | <0.0001            | SKAP2     | 0.0802     | 0.03146 to 0.1288 | 0.0008             |
| CLEC2D    | 0.1478     | 0.0942 to 0.1950  | <0.0001            | PDCD8P    | 0.1716     | 0.1238 to 0.1966  | <0.0001            | DNM3      | 0.07987    | 0.03122 to 0.1283 | 0.0008             |
| CLEC4D    | 0.181      | 0.1333 to 0.2278  | <0.0001            | PDGFA     | 0.3293     | 0.2850 to 0.3721  | <0.0001            | MDM4      | 0.07976    | 0.03102 to 0.1281 | 0.001              |
| CMP       | 0.1047     | 0.05617 to 0.1528 | <0.0001            | PDLIM1    | 0.1846     | 0.1369 to 0.2313  | <0.0001            | TSPAN2    | 0.07913    | 0.03039 to 0.1275 | 0.0011             |
| CDC4      | 0.2169     | 0.1648 to 0.2333  | <0.0001            | PDC1A     | 0.2441     | 0.1961 to 0.2911  | <0.0001            | SLC11A1   | 0.07897    | 0.03037 to 0.1275 | 0.0011             |
| CREBBP    | 0.0981     | 0.0540 to 0.1472  | <0.0001            | PF4V1     | 0.2917     | 0.2463 to 0.3357  | <0.0001            | SUP1H     | 0.07808    | 0.03034 to 0.1274 | 0.0011             |
| CRISPLD2  | 0.1699     | 0.1220 to 0.2169  | <0.0001            | PLYR1P1   | 0.1955     | 0.1481 to 0.2421  | <0.0001            | NSD1      | 0.07832    | 0.02958 to 0.1267 | 0.0012             |
| CSNK1G2   | 0.116      | 0.06757 to 0.1609 | <0.0001            | PK3CA     | 0.1299     | 0.07750 to 0.1737 | <0.0001            | GNAX      | 0.07698    | 0.02793 to 0.1251 | 0.0015             |
| CSNK2A2   | 0.1453     | 0.0970 to 0.1928  | <0.0001            | PKCCE     | 0.428      | 0.3793 to 0.4781  | <0.0001            | ABCC3     | 0.07698    | 0.02793 to 0.1251 | 0.0015             |
| CTSW      | 0.181      | 0.1333 to 0.2278  | <0.0001            | PM2       | 0.1503     | 0.1022 to 0.1977  | <0.0001            | ABCC3     | 0.07407    | 0.02530 to 0.1225 | 0.0022             |
| CUL1      | 0.1188     | 0.07032 to 0.1667 | <0.0001            | PKHD1L1   | 0.3729     | 0.3301 to 0.4142  | <0.0001            | POLR2A    | 0.07287    | 0.02410 to 0.1213 | 0.0026             |
| CXCL5     | 0.4589     | 0.4194 to 0.4966  | <0.0001            | PLCB4     | 0.0971     | 0.04848 to 0.1453 | <0.0001            | CYP4F3    | 0.07216    | 0.02339 to 0.1206 | 0.0029             |
| DAB2      | 0.2744     | 0.2366 to 0.3314  | <0.0001            | PMAP2B    | 0.1914     | 0.1439 to 0.2391  | <0.0001            | SLMO1     | 0.07209    | 0.02333 to 0.1205 | 0.0029             |
| DDX5      | 0.1309     | 0.08254 to 0.1786 | <0.0001            | POMK      | 0.1193     | 0.07082 to 0.1671 | <0.0001            | SLAMF1    | 0.07177    | 0.02299 to 0.1202 | 0.003              |
| DDX60     | 0.09845    | 0.04984 to 0.1466 | <0.0001            | PPP1A     | 0.3496     | 0.3060 to 0.3918  | <0.0001            | IGKV1D-16 | 0.07152    | 0.02274 to 0.1200 | 0.0031             |
| DEFAB1B   | 0.2007     | 0.1533 to 0.2471  | <0.0001            | PP2MA     | 0.2027     | 0.1554 to 0.2491  | <0.0001            | NOLC1     | 0.07146    | 0.02268 to 0.1199 | 0.0031             |
| DEK       | 0.1201     | 0.0726 to 0.1691  | <0.0001            | PRKAC     | 0.214      | 0.1659 to 0.2601  | <0.0001            | SLC11A1   | 0.07138    | 0.02268 to 0.1199 | 0.0031             |
| DHX9      | 0.125      | 0.07656 to 0.1728 | <0.0001            | PRDX6     | 0.1473     | 0.09917 to 0.1948 | <0.0001            | ARHGAP12  | 0.07098    | 0.02220 to 0.1194 | 0.0033             |
| DPDC      | 0.2306     | 0.1838 to 0.2763  | <0.0001            | PREX1     | 0.09517    | 0.04653 to 0.1434 | <0.0001            | VEZF1     | 0.07028    | 0.02150 to 0.1187 | 0.0037             |
| EGF       | 0.2901     | 0.2447 to 0.3342  | <0.0001            | PRKAR2B   | 0.09018    | 0.04754 to 0.1444 | <0.0001            | UFL1      | 0.07013    | 0.02135 to 0.1186 | 0.0037             |
| EP2AK2    | 0.1649     | 0.1170 to 0.2121  | <0.0001            | PRKCB     | 0.1598     | 0.1118 to 0.2070  | <0.0001            | ARHGAP15  | 0.06967    | 0.02088 to 0.1174 | 0.004              |
| EP4G1     | 0.1278     | 0.07944 to 0.1756 | <0.0001            | PROS1     | 0.2561     | 0.2098 to 0.3011  | <0.0001            | IGKV1-5   | 0.06896    | 0.02017 to 0.1174 | 0.0044             |
| ELP1      | 0.2235     | 0.1766 to 0.2695  | <0.0001            | RNF11     | 0.1117     | 0.06864 to 0.1650 | <0.0001            | EP2AK3    | 0.06887    | 0.02008 to 0.1173 | 0.0044             |
| ELP2      | 0.251      | 0.2047 to 0.2963  | <0.0001            | RPL30     | 0.1822     |                   |                    |           |            |                   |                    |

## Supplemental Methods for:

# Failed immune responses across multiple pathologies share pan-tumor and circulating lymphocytic targets

### Study design

This is a study of renal cancer patients who underwent resection for stage I-IV RCC at the CHUM (Montreal, Quebec, Canada), between 2013 and 2017. Written and informed consent procedures were approved by the CHUM research ethics board (REB). Informed consent was obtained from all subjects for participation in the CHUM kidney biobank (CHUM ref no. SL07.053) prior to the collection of specimens, and all methods were performed in accordance with the relevant guidelines and regulations. Clinical patient data was randomly numbered for complete anonymity. Training cohort and validation cohort had similar overall clinicopathological parameters (Supplemental Table 1), with exception that all training cohort patients were ccRCC, while a few pRCC and RCC patients were included in the validation cohort. The TCGA KIRC ccRCC RNA-seq datasets and clinical files used for analysis of single prognostic and synergistic prognostic DEGs ( $n = 534$  tumor and  $n = 72$  normal), were downloaded from <http://gdac.broadinstitute.org/> on 02/12/2016. Pan-cancer, MAS5-normalized patient cohort GEO, the EGA and TCGA datasets including lung ( $n = 2,435$ ), breast ( $n = 5,143$ ), gastric ( $n = 2,183$ ), and ovarian ( $n = 1,816$ ) cancers, were derived from <http://kmplot.com/>. DEG protein profiles in cells and across 17 cancers were derived from <https://www.proteinatlas.org/>. For comparison of our DEGs to cancer immunotherapy resistance genes, we used two datasets, including a transcriptomic dataset from melanoma patients treated with anti-PD-1 therapy ( $n = 38$ ) (1), in addition to a genetic

dataset from NSCLC patients treated with anti-PD-1 therapy (n = 31) (2). To compare our DEGs the effects of HIV-1 infection, we used a HIV-1 elite controllers dataset (n = 81 patient, n = 98 controls) (3). For comparison of DEGs to bacterial infection induced effects, we used four including generalized bacterial infection, sepsis, and specific infection by *Staphylococcus aureus* and *Escherichia coli* (n = 157 cases, n = 157 controls) (4).

### **Rapid RNA extraction from CD8<sup>+</sup> and CD19<sup>+</sup> immune cells**

To avoid ischemia effects on RNA and proteins, tissue specimens and paired patient blood were kept on ice during immediate transport following surgical extraction, from operating rooms to pathology by a specialized research technician. Expert renal pathologists immediately classified and selected experimental tissues (i.e., tumor and normal adjacent tissues distant from tumor margins), and according to the defined guidelines from the WHO 2004 and the WHO 2016. Selected specimens were kept on ice during direct transport from pathology to TIL extraction laboratories. For the isolation of TILs and TIICs from freshly resected kidney tumors and normal adjacent tissues, cold tissues were homogenized using three consecutive cycles of the h\_tumor\_01 program of the gentleMACS™ Dissociator (Miltenyi Biotec, USA), and resulting cellular suspensions were passed through a 0.45 µm filter fit onto a 50 mL falcon tubes (Fisher), were pelleted by centrifugation (4 °C, 10 min, 300 g), and were subjected to Ficoll gradient separating lymphocytes from tumoral material (Lymphocyte separation medium; WISSENT Bioproducts) followed by an additional two 50 mL PBS washes prior to cell pelleting by centrifugation (4 °C, 10 min, 300 g). 40 mL of blood from patients and matched control

donors were treated alongside tumors, via dilution in PBS for Ficoll gradient separation of immune cells (Lymphocyte separation medium; WISENT Bioproducts), pelleting of cells (4 °C, 10 min, 300 g), and followed by two additional 50 mL PBS washes prior to cell pelleting by centrifugation. Cell pellets were resuspended in EasySep™ Buffer (STEMCELL Technologies), and cells were counted and resuspended at appropriate dilutions for extraction using Human CD8 and CD19 Positive Selection Kits (STEMCELL Technologies), used as recommended by the manufacturer for the rapid isolation of CD8<sup>+</sup> and CD19<sup>+</sup> immune cells. Total RNA was purified using QIAshredder cell-lysate homogenizers followed by the RNeasy Plus Micro Kit (QIAGEN). The quality of the total RNA was evaluated with the RNA 6000 nano LabChip kit on an Agilent 2100 Bioanalyzer system (Agilent Technologies).

### **Flow cytometry**

Efficiency of isolation of various immune cell subsets from tumors was quality tested using flow cytometry (**Supplemental figure S2**). Cells were counted and resuspended in PBS for transfer to 5 mL polystyrene round bottom FACS tubes (Falcon) where non-specific binding sites were blocked with human gamma globulin (Jackson ImmunoResearch) and dead cells were labeled for flow cytometry-mediated elimination using a LIVE/DEAD fixable Aqua Dead Cell Stain Kit (Life technologies) for 20 min at 4 °C. Following a cold PBS wash and centrifugation (4 °C, 5 min, 300 g), cells were resuspended in cold FACS buffer (PBS containing 0.5% BSA and 0.1% NaN<sub>3</sub>) and were stained for 30 min at 4 °C with the following titrated monoclonal antibodies, α-CD45-PE-Cy7 (clone HI30), α-CD8-PE-Cy5 (clone RPA-T8), α-CD4-APC-H7 (clone L200), α-CD19-AF700 (clone HIB19),

Supplemental methods: Pan-Pathology targets of the failed immune response

and  $\alpha$ -CD11c-APC (clone B-ly6) (BD Biosciences). Clones chosen were recommended by STEMCELL as these are not the same clones used in magnetic beads antibody separation mixtures otherwise interfering with flow cytometry antibodies. Cells were then washed with, and resuspended in cold FACS buffer for flow cytometry analysis. In multi-parametric FACS analyses, compensation beads (BD Biosciences) stained in parallel to cells were used to compensate for fluorescence spill over. Flow cytometry data was acquired using an LSR Fortessa cell analyzer with DIVA software (BD Biosciences) and data was analyzed using FlowJo V10 software.

## **Microarrays**

Microarray experiments were performed using the GeneChip® HTA 2.0 (Affymetrix, Santa Clara, CA). This comprehensive array interrogates 44,699 protein-coding genes and 22,829 non-protein coding genes with approximately ten probes per exon and four probes per exon-exon splice junction. 1 ng of total RNA for each sample was processed using the Affymetrix GeneChip WT Pico Reagent Kit. This kit uses a reverse transcription priming method that specifically primes non-ribosomal RNA, including both poly(A) and non-poly(A) mRNA, and is used to generate sense-stranded cDNA. 5.5  $\mu$ g of the single-stranded cDNA was then fragmented and labeled using the Affymetrix GeneChip WT Terminal Labeling Kit and it this product was hybridized onto the chip. The entire hybridization procedure was performed using the Affymetrix GeneChip system according to the manufacturer's recommendations. Test GeneChip® HTA 2.0 microarrays and GeneChip WT Pico Reagent kits were kindly donated by Peter Graf (Affymetrix). The hybridization was evaluated using the Affymetrix GeneChip



Supplemental methods: Pan-Pathology targets of the failed immune response

Command Console Software (AGCC) and the quality of the chips was assessed using the Affymetrix Expression Console. Normalization and QC analysis: The data obtained was normalized using Partek Genomics Suite™ 6.6 (Partek, St. Louis, Missouri). GC content adjustment, background adjustment, quantile normalization and mean probe set summarization were performed using the Robust Multichip Average (RMA) algorithm. Quality control analysis was then performed and included: QC metrics (pos vs. neg area under curve (AUC), all probe set mean absolute deviation (MAD) residual mean, all probe set relative log expression (RLE) mean, hybridization controls (BAC spike), synthesis controls (poly(A) spike), and log expression signal box plots), signal histograms, and principle component analysis (PCA). RNA expression analysis: Transcripts found to be significantly differentially expressed between groups, i.e., with p-values  $\leq 0.05$  and fold change cutoff of  $\geq 1.5$  (using analysis of variance (ANOVA) with Fisher's Least Significant Difference (LSD) posttest). 4-way Venn diagrams generated to demonstrate DEG overlaps from microarrays were created using <http://www.interactivenn.net/> (5).

### **Real-Time quantitative PCR microfluidics gene expression analysis**

cDNA was synthesized using the High-Capacity Reverse Transcription Kit with RNase Inhibitor (Life Technologies) (25°C for 10 min, 37°C for 120 min, 85°C for 5 min). The produced cDNA was subjected to gene-specific preamplification using Taqman Preamp MasterMix (Applied Biosystems) and 96 pooled TaqMan Assays (Assay IDs are listed in **Supplemental table S4**) (Applied Biosystems) at final concentration 0.2X (95° C for 10 min, followed by 16 cycles of 95°C for 15 s and 60°C for 4 min). The preamplified cDNA was diluted 5-fold in DNA suspension buffer (Teknova) and was mixed with

Supplemental methods: Pan-Pathology targets of the failed immune response

TaqMan Universal PCR Master mix (Life Technologies) and 20X GE sample loading reagent (Fluidigm). 20X Taqman assays were diluted 1:1 with 2X assay loading buffer (Fluidigm). Samples and Taqman assays mixtures were loaded onto a primed 96.96 Dynamic Array chip (Fluidigm). The chip was loaded into the IFC Controller, where each sample was mixed with each assay in every possible combination (a total of 9,216 reactions). The chip was transferred in a Biomark (Fluidigm) for real-time PCR amplification and fluorescence acquisition using single probe (FAM-MGB, reference: ROX) settings and the default hot-start protocol with 40 cycles. Cycle thresholds (Ct) were calculated using the Fluidigm BioMark software and further analysis was carried out using GenEx software (MultiD Analyses, <http://www.multid.se>). Five endogenous control genes were included in each Fluidigm run and the stability of endogenous control genes across all experimental samples was evaluated applying the NormFinder algorithm in GenEx. The geometric mean expression of the four most stable endogenous control genes (IPO8, GUSB, PGK1 and POL2RA) was used for normalization. Relative expression ( $2^{-\Delta Ct}$ ) values were log<sub>2</sub> transformed for subsequent analyses. Unsupervised hierarchical clustering was performed using the `heatmap2` function in R on mean-centered  $-\Delta Ct$  expression values applying the Euclidean distance metric and complete linkage clustering method

(<https://www.rdocumentation.org/packages/gplots/versions/3.0.1/topics/heatmap.2>).

PCA biplots were created on  $-\Delta Ct$  values using the programming language R and function `biplot` (<http://stat.ethz.ch/R-manual/R-devel/library/stats/html/biplot.princomp.html>). Combination testing for revealing smaller sets of patient stratifying pan-cancer genes was performed by PCA testing for patient

Supplemental methods: Pan-Pathology targets of the failed immune response

stratifying combinations of DEGs that were most significantly modulated in expression, correlating, or anti-correlating in ptPBLs versus cdPBLs.

### **Statistical analysis**

For the training ccRCC cohort, a sample size of  $n = 5$  paired patient TILs, TIICs, and PBLs was determined as having above 0.9 power according to the GeneChip Human Transcriptome Array 2.0 manufacturer guidelines (Affymetrix, Thermo Fisher Scientific). Training set microarrays power calculations by the manufacturer used an inference of means calculation from <https://www.stat.ubc.ca/~rollin/stats/ssize/n2>. Multiple hypothesis test correction was performed using the FDR Benjamini–Hochberg step-up procedure. For the RCC validation cohort ( $n = 74$ ), power analysis determined that a minimal sample size of  $n = 62$  to reach a power of 0.80 at  $\alpha = 0.05$  (two-tailed) (G\*Power ver. 3.1.9.2; Universitat Düsseldorf, Germany). For algorithms used, statistical methodology for algorithms is described within scripts and <https://www.biostars.org/p/153013/>. Limma and survival packages for R are used for single and synergistic ccRCC prognostic algorithms. Dendrogram, heatmap and PCA unsupervised algorithms used the Euclidean distance metric and complete linkage clustering method. Correlogram algorithm uses the R corrplot library, and was created from <http://www.sthda.com/>, using r-project corrplot and vignette packages. Binomial correlations for testing of validated DEGs against clinical patient parameters used two-tailed nonparametric Spearman correlation with 95% CI (Prism V6.01, GraphPad). An unpaired 2-tailed student's t test with FDR of 1% was used to compare two groups, and two-way ANOVA (with Sidak's multiple-comparisons test) and 95% CI was used for multiple comparisons. Pathway enrichment analysis results

Supplemental methods: Pan-Pathology targets of the failed immune response

were adjusted for multiple testing by applying FDR and Bonferroni methods. *P*-values of less than 0.05 were considered to indicate a statistically significant difference.

### **Prognostic Signature Validation and gene expression analysis**

Kaplan Meier plotter was used to validate the prognostic value of the ICP signature, and to assess ICP gene expression modulation between tumors and normal tissues. Gene ID symbols were mapped to Affymetrix probes from GEO, EGA and TCGA datasets, and their mean expression was used to assess OS. For K-M, default settings were used with auto select best cutoff and best specific probes (JetSet probes). The 2017 version of Kaplan Meier plotter contains information on 54,675 genes for survival, including 2,437 lung, 5,143 breast, 1,065 gastric, and 1,816 ovarian cancer patients with mean follow-up times of 49, 69, 33, and 40 months, respectively.

### **Protein-Protein Interaction Network and Pathway Enrichment Analysis, and pan-cancer MMP-9 PPI networks**

To test validity of performing in depth analyses on DEG datasets, online search engine STRING: functional protein association networks; (<https://string-db.org/>) was first used to observe PPIs and PPI enrichment values. Then, top 200 pan-cancer DEGs and all ccRCC ptPBLs were subjected to comprehensive pathway enrichment analysis using pathDIP ver. 3 (<http://ophid.utoronto.ca/pathDIP>) (6). Default settings were used, with extended pathway associations (combining literature curated core pathways with associations predicted using physical protein interactions with minimum confidence levels of 0.99). Lists were also used to retrieve physical protein interactions and explore

biologically relevant links. IID ver. 04-2018 (<http://ophid.utoronto.ca/iid>) was used to map identified biomarkers to proteins and retrieve their interacting partners (7). Default settings were used, and interactions among partners of query proteins, source information (detection methods, PubMed IDs, reporting databases), and tissue information (presence/absence of interactions in selected tissues) were included. Corresponding networks were visualized using NAViGaTOR ver. 3 (<http://ophid.utoronto.ca/navigator>) (8).

For MMP-9 PPI networks: For PPI networks, 216 human PPIs for MMP-9 were obtained from IID (version 04-2018), 205 of which have proteins mapping to the gene expression data. Furthermore, 3,880 PPIs among interactors of MMP-9 were found, out of which, 3,776 PPIs were mapped to gene expression data. All of these PPIs were annotated with differential gene-coexpression and their normal or cancer specificity across thirteen different tissues (6). For differential gene co-expression networks, raw gene expression profiles for 1,013 non-malignant (N) and 1,788 tumor (T) pre-treatment patient samples were obtained from GEO. These data cover thirteen tissue-cancers, comprising: breast (86 N, 93 T), cervical (30 N, 52 T), colorectal (117 N, 345 T), endometrial (21 N, 58 T), esophageal (132 N, 159 T), renal (89 N, 111 T renal), liver (20 N, 20 T), lung (188 N, 510 T), mouth (oral cavity and tongue; 67 N, 70 T), ovarian (49 N, 71 T), pancreatic (61 N, 73 T), prostate (96 N, 143 T), and thyroid (57 N, 84 T). GEO Accession Numbers of sample source datasets are as follows, (downloaded in 11/2012): GSE19383, GSE26910, GSE3744, GSE5764, GSE20437, GSE5364, GSE5462, GSE6883, GSE9574, GSE9750, GSE20916, GSE8671, GSE41258, GSE5364, GSE11024, GSE14762, GSE8271, GSE6280, GSE6344, GSE781, GSE6280, GSE6344,

## Supplemental methods: Pan-Pathology targets of the failed immune response

GSE781, GSE29721, GSE14520, GSE10245, GSE19188, GSE28571, GSE31210, GSE31908, GSE10072, GSE31908, GSE5364, GSE7670, GSE31908, GSE14407, GSE15578, GSE18520, GSE19383, GSE36668, GSE38666, GSE15471, GSE16515, GSE22780, GSE17951, GSE32448, GSE32982, GSE3325, GSE6956, GSE29265, GSE3467, GSE3678, GSE6004, GSE27155, GSE5364; (downloaded 01/2016): GSE17025, GSE20347, GSE23400, GSE29001, GSE30784, GSE31056, GSE33426, GSE38129, GSE53757, GSE64985, GSE7305, GSE7307, GSE7803). Due to the lower sensitivity of co-expression (i.e., pairwise correlation) to batch effects relative to expression analysis, all samples were normalized using the MAS5 function implemented in Affy package (1.48.0) in R (9). For differentially co-expressed PPIs, for each pair of N and T samples in tissue-cancer datasets, their relevant co-expression matrices (i.e.,  $\rho_N$  and  $\rho_T$ ) were calculated using Pearson Correlation Coefficient. Absolute values of the difference between these two matrices as the differential co-expression matrix (i.e.,  $\text{Diff}_{(N,T)}$ ) were used. For each dataset, PPIs whose corresponding gene pair were among the top 1% of values in  $\text{Diff}_{(N,T)}$  were annotated as differential PPIs in that particular tissue-cancer dataset. For MMP-9, we found 106 PPIs (out of 205) and for PPI networks among MMP-9 interactors, we found 1,814 PPI (out of 3,776) differentially co-expressed PPIs in at least one tissue-cancer dataset. Gained PPIs in tumour (tumour-specific PPIs) were defined as PPIs with  $\rho_T > \rho_N$ , and lost PPIs in tumour (normal-specific PPIs) were defined as PPIs with  $\rho_N > \rho_T$ . For significance of the number of differential PPIs across tissue-cancers, a binomial test was used to identify tissue-cancers in which the number of differential PPIs has been statistically significant. Expected probability of an interaction to be differential at each tissue-cancer was calculated by dividing the sum of differential

Supplemental methods: Pan-Pathology targets of the failed immune response

PPIs across all tissue-cancers by the total possibilities it may have across all tissue-cancers (i.e., the number of tissues multiplied by the size of the union of the differential PPIs). Heatmaps were generated using gplots package (version 3.0.1) in R.

### **Data availability**

TCGA KIRC RNA-seq datasets and associated clinical datasets are available at the cBioPortal for Cancer Genomics at <http://gdac.broadinstitute.org/>. Pan-cancer testing patient cohort GEO, the EGA and TCGA datasets are available at <http://kmpplot.com/>. DEG protein profiles in cells and across 17 cancers are available from <https://www.proteinatlas.org/>. Transcriptomic datasets from melanoma and NSCLC patients treated with anti-PD-1 therapy are available from Hugo et al. (1), and Rizvi et al. (2). The HIV-1 elite controllers dataset is available from Zhang et al. (3), and the bacterial datasets are listed in Song et al. (4). Comprehensive pathway enrichment analysis and PPI analyses are available as Supplemental Data. The microarray data is published at the National Center for Biotechnology Information Gene Expression Omnibus (<http://www.ncbi.nlm.nih.gov/geo>) under GEO accession number GSE117230.

### **Code availability**

R source codes used for: heatmaps, dendrograms, PCAs, prognostic genes identification from TCGA KIRC, synergistic prognostic genes identification from TCGA KIRC, and correlograms are available from the authors upon reasonable request.

## Supplemental Methods References

1. Hugo W, Zaretsky JM, Sun L, Song C, Moreno BH, Hu-Lieskovan S, et al. Genomic and Transcriptomic Features of Response to Anti-PD-1 Therapy in Metastatic Melanoma. *Cell*. 2016;165(1):35-44.
2. Rizvi NA, Hellmann MD, Snyder A, Kvistborg P, Makarov V, Havel JJ, et al. Cancer immunology. Mutational landscape determines sensitivity to PD-1 blockade in non-small cell lung cancer. *Science*. 2015;348(6230):124-8.
3. Zhang LL, Zhang ZN, Wu X, Jiang YJ, Fu YJ, and Shang H. Transcriptomic meta-analysis identifies gene expression characteristics in various samples of HIV-infected patients with nonprogressive disease. *J Transl Med*. 2017;15(1):191.
4. Song F, Qian Y, Peng X, Li X, Xing P, Ye D, et al. The frontline of immune response in peripheral blood. *PLoS One*. 2017;12(8):e0182294.
5. Heberle H, Meirelles GV, da Silva FR, Telles GP, and Minghim R. InteractiVenn: a web-based tool for the analysis of sets through Venn diagrams. *BMC Bioinformatics*. 2015;16:169.
6. Rahmati S, Abovsky M, Pastrello C, and Jurisica I. pathDIP: an annotated resource for known and predicted human gene-pathway associations and pathway enrichment analysis. *Nucleic acids research*. 2017;45(D1):D419-D26.
7. Kotlyar M, Pastrello C, Malik Z, and Jurisica I. IID 2018 update: context-specific physical protein-protein interactions in human, model organisms and domesticated species. *Nucleic acids research*. 2018.
8. Brown KR, Otasek D, Ali M, McGuffin MJ, Xie W, Devani B, et al. NAViGaTOR: Network Analysis, Visualization and Graphing Toronto. *Bioinformatics*. 2009;25(24):3327-9.
9. Lim WK, Wang K, Lefebvre C, and Califano A. Comparative analysis of microarray normalization procedures: effects on reverse engineering gene networks. *Bioinformatics*. 2007;23(13):i282-8.
